# Supplementary material for: An 80 kyr-long continuous speleothem record from Dim Cave, SW Turkey with paleoclimatic implications for the Eastern Mediterranean
Source: PubMed Central journal article supplement (PMC4559661; doi:10.1038/srep13560), 2015-09-04
Supplement: srep13560-s1.pdf [file srep13560-s1.pdf]

## Supplementary Online Material

### An 80 kyr-long continuous speleothem record from Dim Cave, SW Turkey with paleoclimatic implications for the Eastern Mediterranean

by Ezgi Ünal-İmer, James Shulmeister, Jian-Xin Zhao, I. Tonguç Uysal, Yue-Xing Feng, Ai Duc Nguyen, Galip Yüce

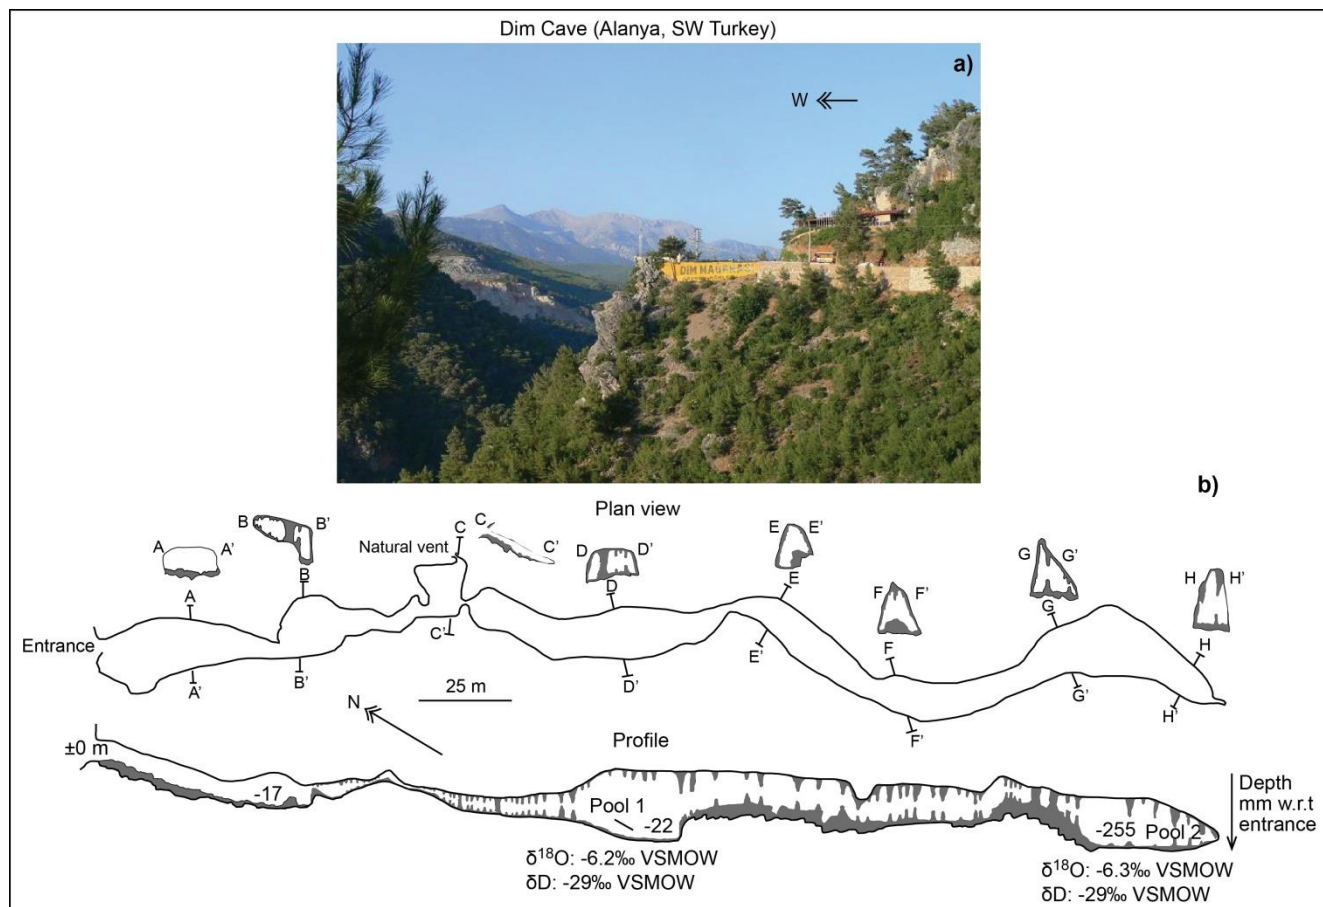

**Figure S1** View of Dim Cave looking north **(a)**, plan view and projected profile of Dim Cave with  $\delta^{18}\text{O}$  and  $\delta\text{D}$  data of the pool waters **(b)**. Photograph in **(a)** is taken by E.U.I. Plan and profile views of the cave in **(b)** are re-drawn and simplified from an archived report<sup>1</sup> of the General Directorate of Mineral Research and Exploration (Turkey), using the software Adobe Illustrator CS5, version 15.0.2 (<http://www.adobe.com/support/downloads/product.jsp?platform=Windows&product=27>).

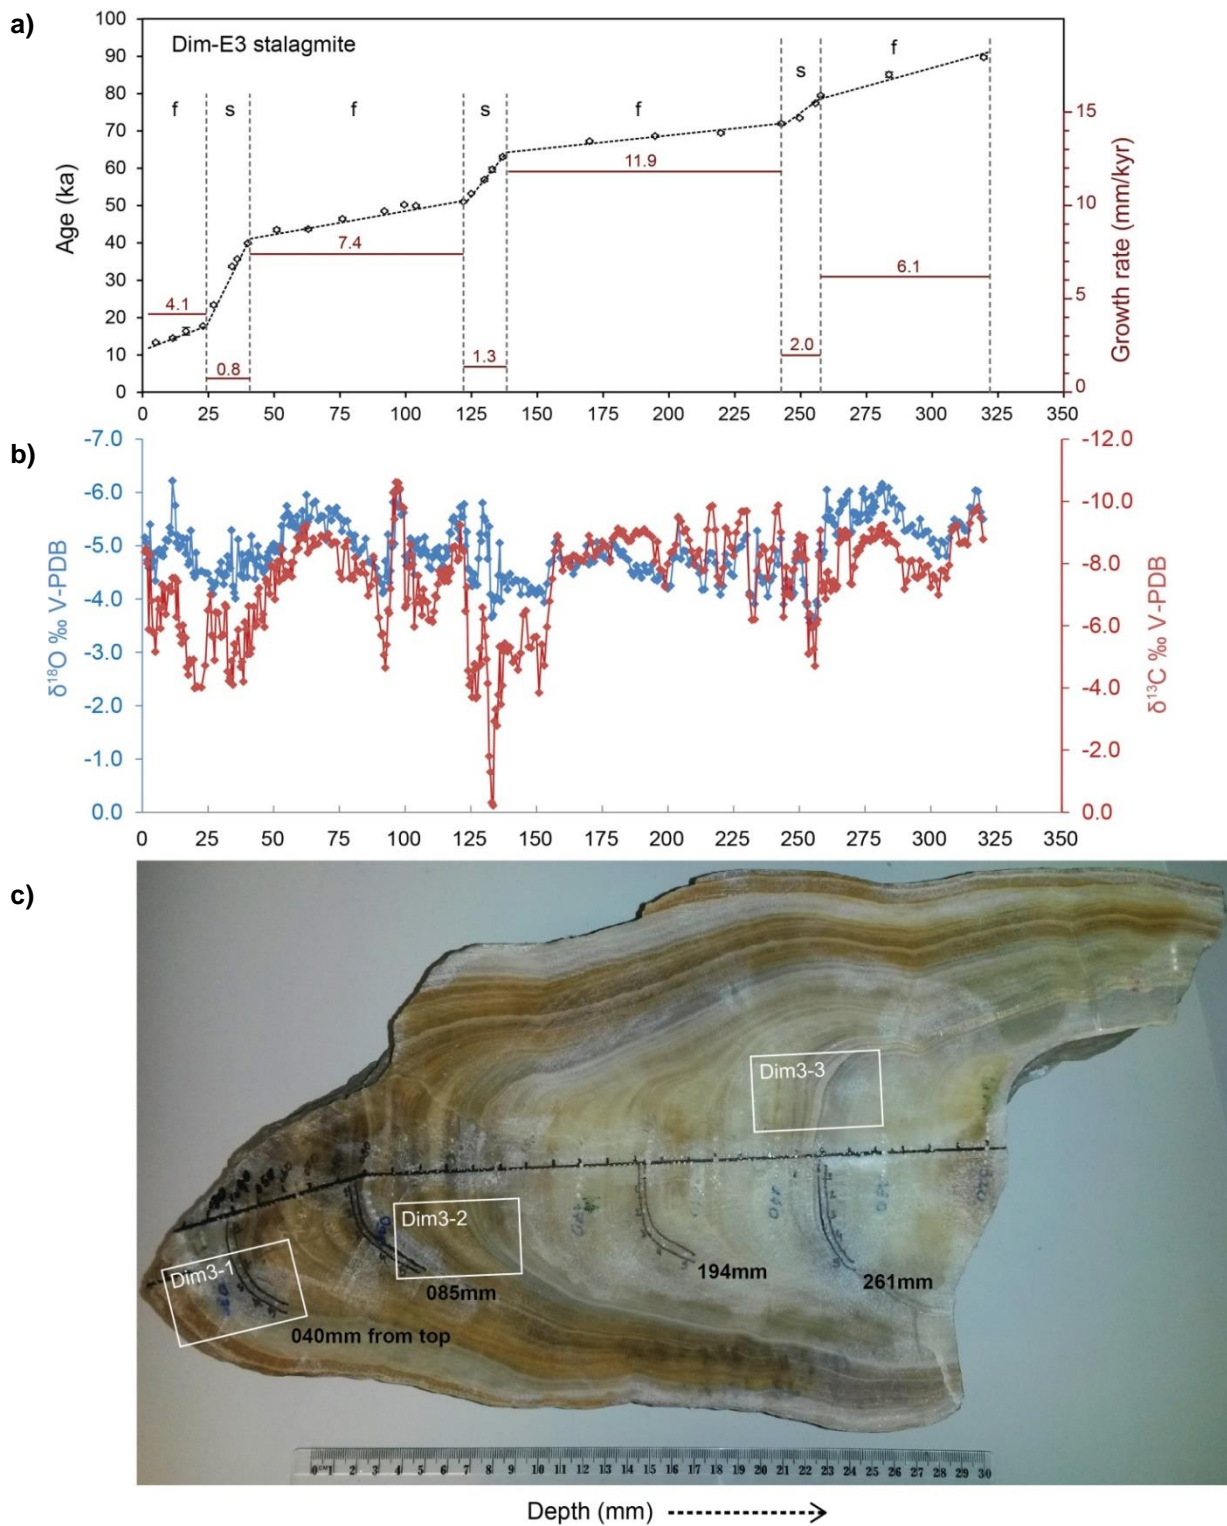

**Figure S2 (a)** Growth patterns observed in stalagmite Dim-E3 and **(b)**  $\delta^{18}\text{O}$  and  $\delta^{13}\text{C}$  isotopic values measured along the axis (mm) of Dim-E3. **(c)** Photo of Dim-E3 showing the Hندی test locations (covering four distinct growth periods: at 040, 085, 194, and 261mm from the tip). White rectangular areas in **(c)** show locations for the thin sections labelled as Dim3-1, -2, and -3. Sudden enrichment in  $\delta^{13}\text{C}$  (from -9 to -5‰) at ~74 kyr could indicate mixed waters buffered with host dolomitic limestone, forming aragonite layers (Fig. S5c and d) in the speleothem. Possible short hiatuses in Dim-E3 may be associated with lateral offsets and/or sudden color changes at ~77, 60, 48.5, and between 33 and 23 kyr coinciding with the lowest growth rate (0.8mm/kyr; Fig. S2a) during LGM. None of these putative hiatuses are discernible at the resolution of the dating. s: slow, f: fast in **(a)**.

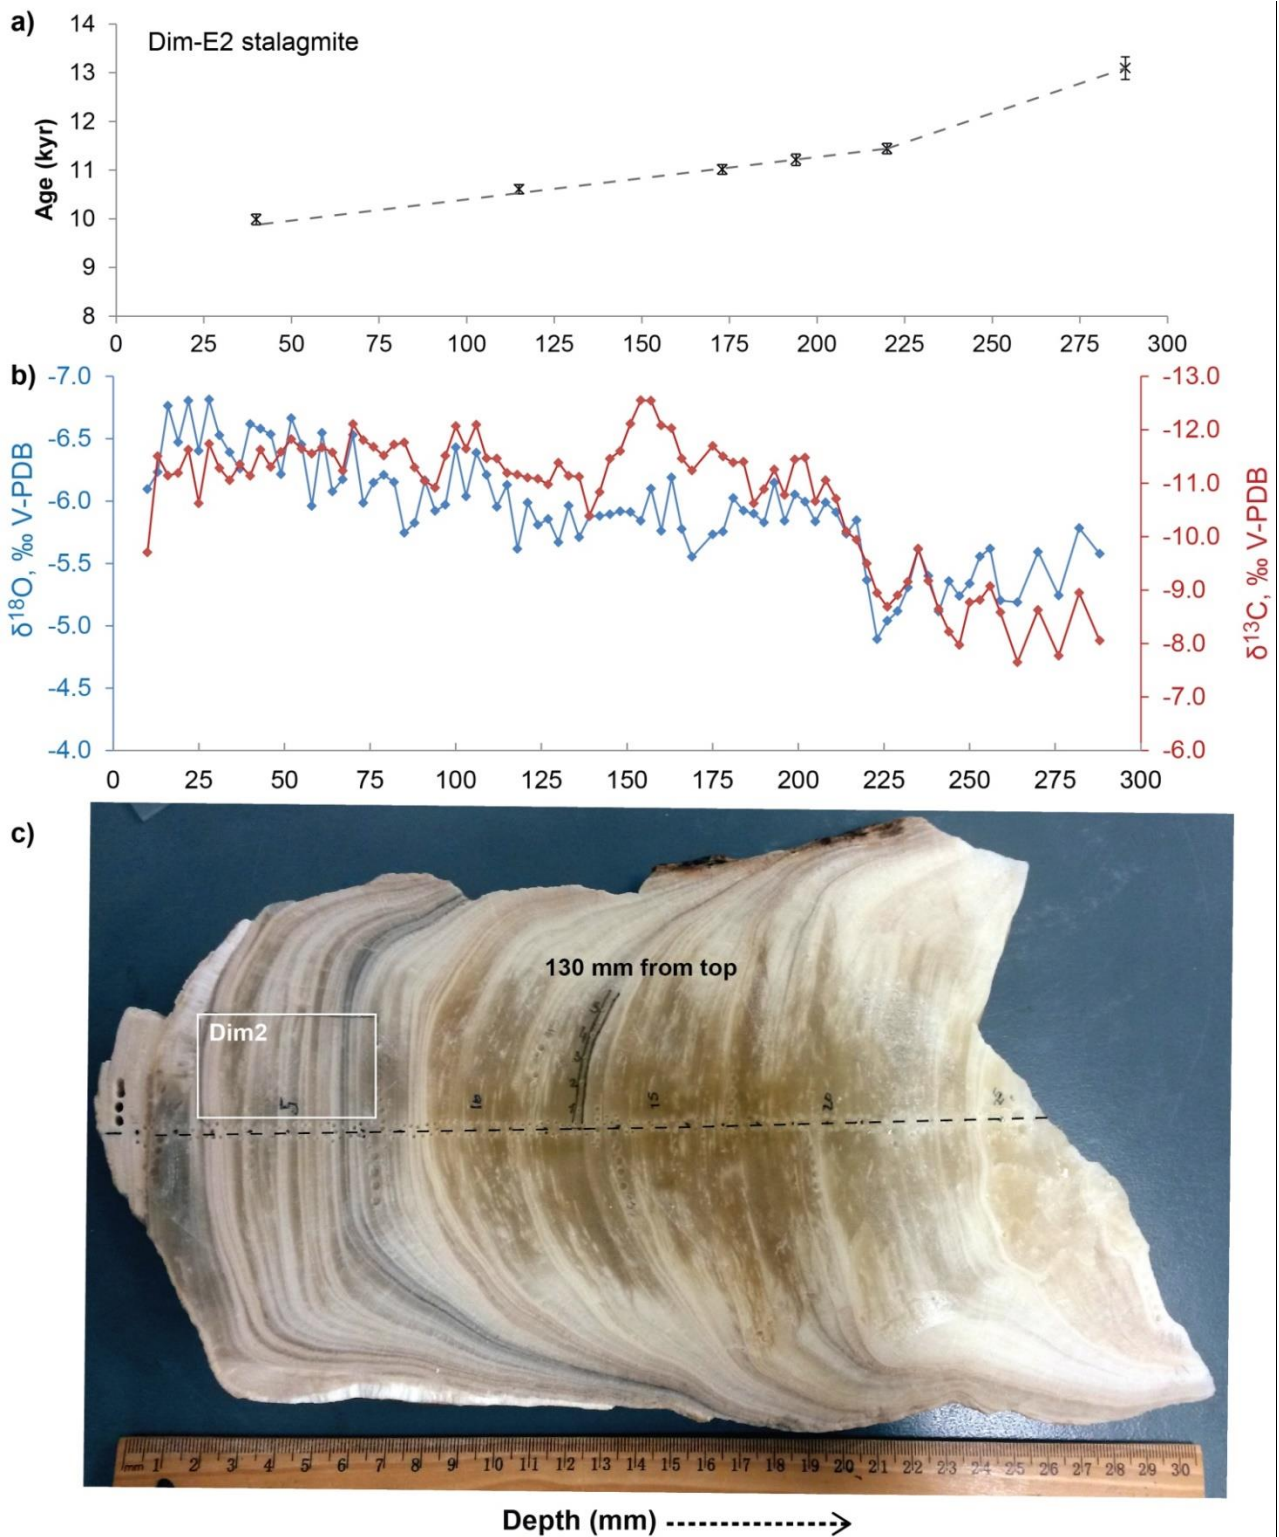

**Figure S3** (a) Growth axes of stalagmite Dim-E2 and (b)  $\delta^{18}\text{O}$  and  $\delta^{13}\text{C}$  isotopic values measured along the axis (mm) of Dim-E2. (c) Photo of Dim-E2 showing the Hندی test location at 130mm from the tip. White rectangular area in (c) shows location for the thin section: Dim2. Microstratigraphy of Dim-E2 reveals a continuous growth with open/compact columnar calcite with visible banding. Depending on the age-depth model, Dim-E2 suggests fairly continuous growth at relatively constant drip rate except for a possible hiatus at around 11.4 kyr at about 255 mm from the tip.



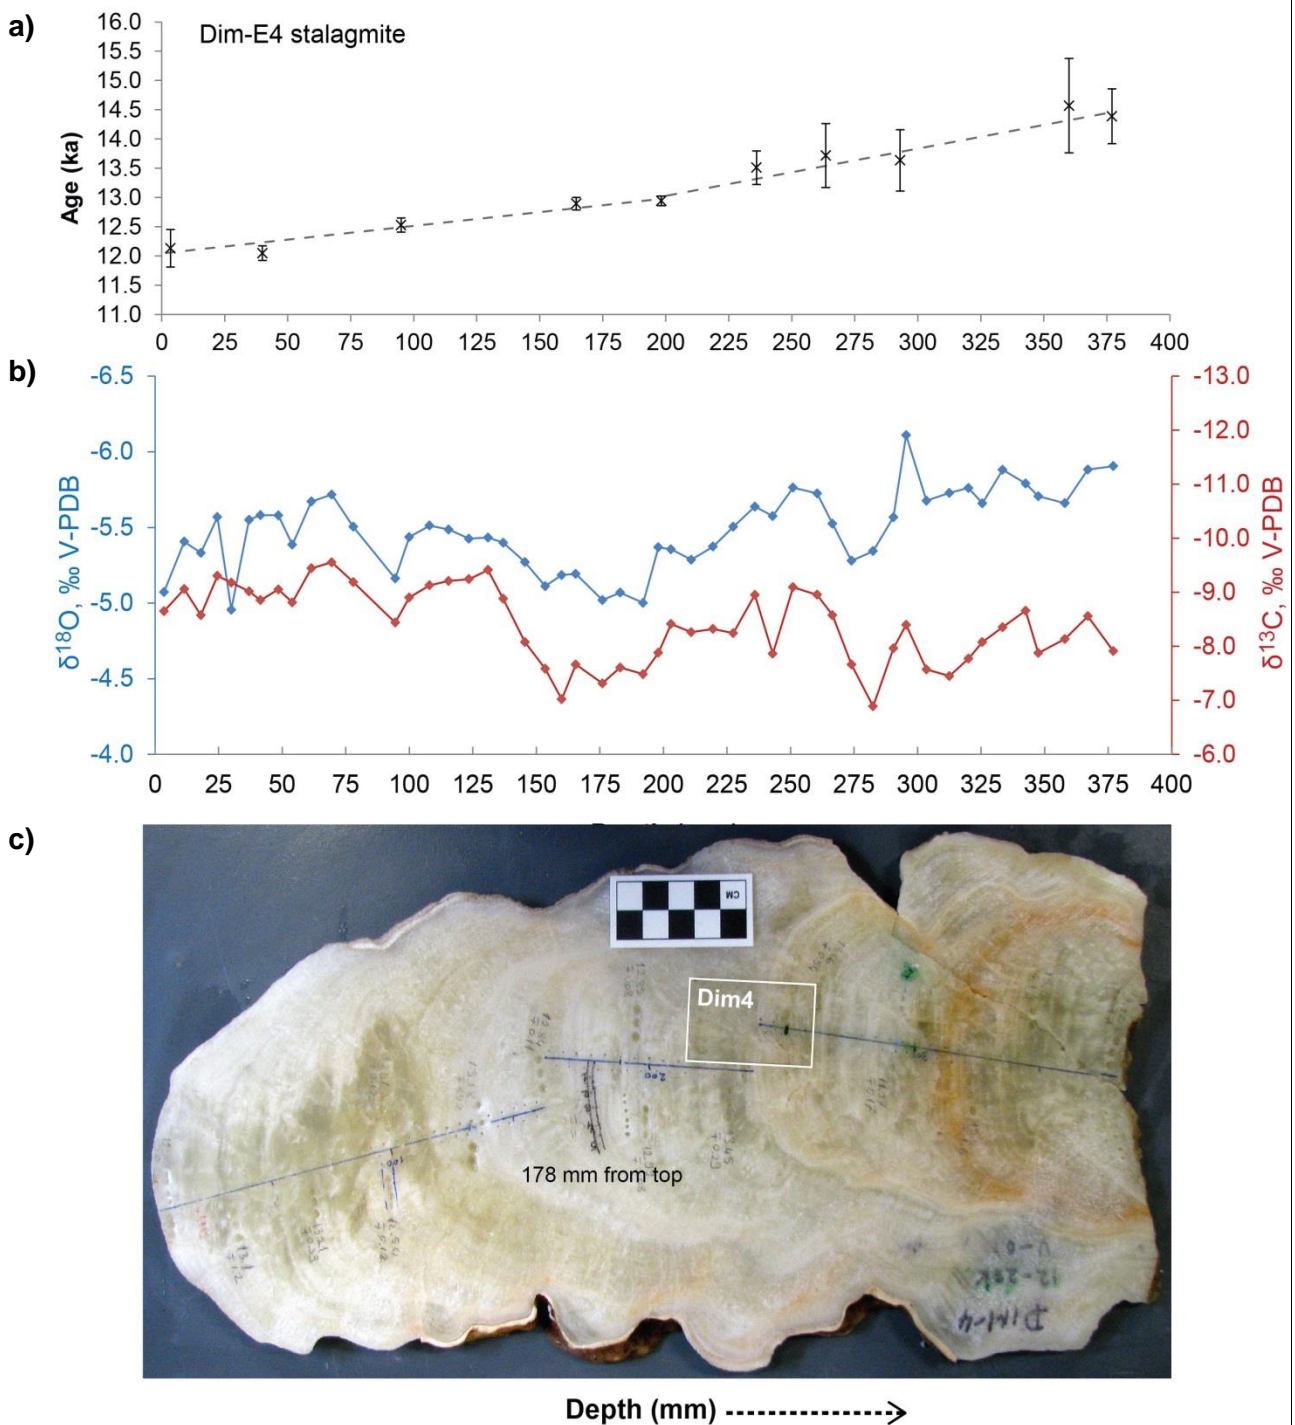

**Figure S4 (a)** Growth periods observed in stalagmite Dim-E4 and **(b)**  $\delta^{18}\text{O}$  and  $\delta^{13}\text{C}$  isotopic values measured along the axis (mm) of Dim-E4. **(c)** Photo of Dim-E4 showing Hendy test location at 178mm from the tip. White rectangular area in **(c)** shows the location for the thin section: Dim4. Microstratigraphy of Dim-E4 shows three distinct growth periods with milky/transparent open columnar and diagenetic mosaic and colloform/dendritic fabrics indicative of seasonal change in drip rate. Rapid-growth Dim-E4 shows two lateral displacements at around 160 and 275 mm from tip corresponding the ages of 12.8 and 13.6 kyr, which may indicate a minor break in growth.



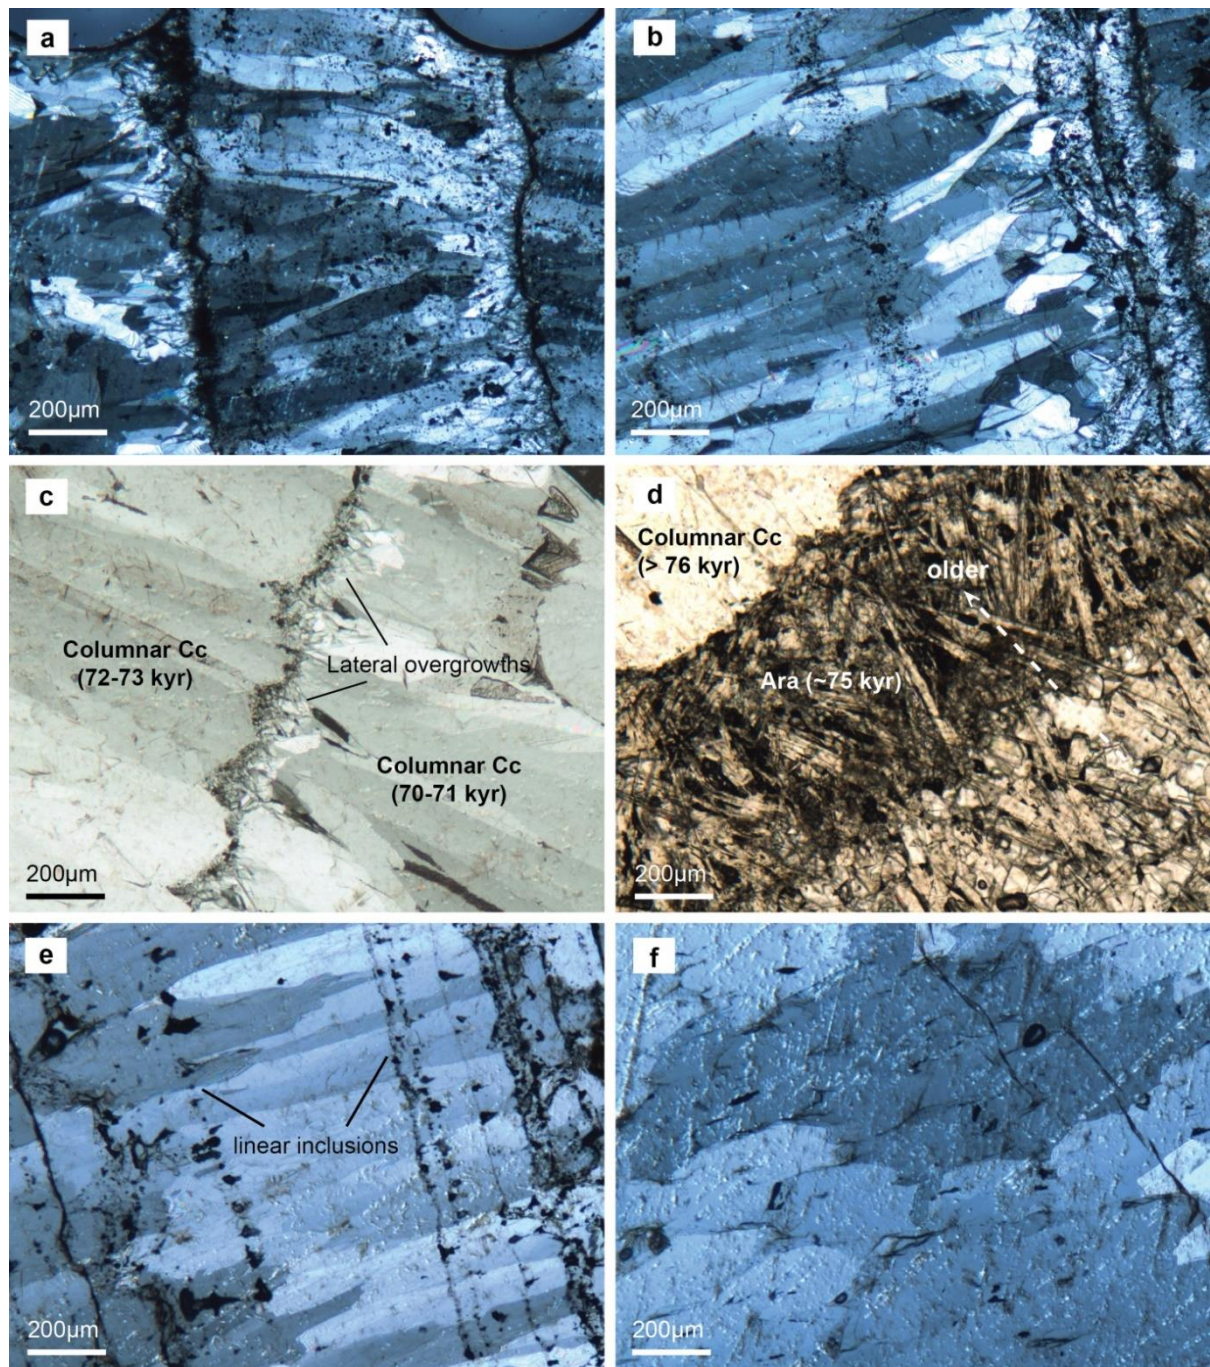

**Figure S5** Representative microstructure and calcite fabrics of Dim-E3 (a,b,c, and d), Dim-E2 (e), and Dim-E4 (f) under transmitted light. **a)** Columnar (open) calcite with clear parallel banding and sharp terminations in growth, XPL, from Dim3-1 thin section (marked with rectangular area in Fig. S2c). **b)** Columnar (open) calcite showing intercrystalline boundaries (dark coloured linear inclusions and micritic formations) when growth (or drip rate) is interrupted, XPL, Dim3-2 section in Fig. S2c. **c)** Younger calcite generations and lateral overgrowths in Dim3-3 section, XPL. **d)** Acicular/radiating aragonite (Ara) layers at ~75 kyr with replacement textures towards younger columnar calcite (Cc) layers, from Dim3-3 in Fig.S2c, PPL. **e)** Open/compact columnar calcite indicating relatively constant drip rate, from Dim2 in Fig.S3c, XPL. **f)** Diagenetic mosaic calcite (crystals  $>30\mu\text{m}$ )<sup>2</sup> with irregular boundaries (and inclusions), representative of Dim4 thin section (~13 kyr) in Fig. S4c, XPL.

**Table S1** MC-ICP-MS Uranium (U)-series age data for stalagmites Dim-E3, Dim-E2, and Dim-E4 from the Dim Cave (Alanya, SW Turkey)

| Sample ID   | Distance from tip (mm) | U (ppm) | $\pm 2\sigma$ | $^{232}\text{Th}$ (ppb) | $\pm 2\sigma$ | $^{230}\text{Th}/^{232}\text{Th}$ | $\pm 2\sigma$ | $^{230}\text{Th}/^{238}\text{U}$ | $\pm 2\sigma$ | $^{234}\text{U}/^{238}\text{U}$ | $\pm 2\sigma$ | Uncorr. Age (kyr) | $\pm 2\sigma$ | *Corr. Age (kyr) | $\pm 2\sigma$ | Corr. Initial ( $^{234}\text{U}/^{238}\text{U}$ ) | $\pm 2\sigma$ |
|-------------|------------------------|---------|---------------|-------------------------|---------------|-----------------------------------|---------------|----------------------------------|---------------|---------------------------------|---------------|-------------------|---------------|------------------|---------------|---------------------------------------------------|---------------|
| Dim-E3-0050 | 5                      | 0.2389  | 0.0001        | 6.16                    | 0.007         | 17.56                             | 0.12          | 0.1494                           | 0.001         | 1.2435                          | 0.0016        | 13.90             | 0.10          | 13.28            | 0.31          | 1.2546                                            | 0.0019        |
| Dim-E3-0115 | 11.5                   | 0.1756  | 0.0001        | 6.56                    | 0.007         | 12.95                             | 0.07          | 0.1595                           | 0.0008        | 1.2106                          | 0.0016        | 15.35             | 0.09          | 14.44            | 0.45          | 1.2216                                            | 0.002         |
| Dim-E3-0165 | 16.5                   | 0.1608  | 0.0001        | 13.56                   | 0.014         | 6.9                               | 0.07          | 0.1919                           | 0.0018        | 1.2325                          | 0.0023        | 18.36             | 0.20          | 16.3             | 1.0           | 1.2491                                            | 0.0038        |
| Dim-E3-0225 | 23                     | 0.075   | 0.0000        | 0.98                    | 0.003         | 63.03                             | 0.78          | 0.2716                           | 0.0032        | 1.7733                          | 0.0058        | 17.92             | 0.24          | 17.70            | 0.26          | 1.8158                                            | 0.0061        |
| Dim-E3-0270 | 27                     | 0.0767  | 0.0000        | 1.98                    | 0.003         | 34.96                             | 0.45          | 0.2968                           | 0.0038        | 1.4943                          | 0.0027        | 23.85             | 0.34          | 23.35            | 0.41          | 1.5317                                            | 0.0034        |
| Dim-E3-0340 | 34                     | 0.0997  | 0.0001        | 1.69                    | 0.003         | 68.81                             | 0.42          | 0.3852                           | 0.0023        | 1.4198                          | 0.002         | 34.00             | 0.24          | 33.66            | 0.28          | 1.4638                                            | 0.0024        |
| Dim-E3-0360 | 36                     | 0.1143  | 0.0001        | 0.95                    | 0.002         | 137.22                            | 0.86          | 0.3759                           | 0.0023        | 1.3253                          | 0.0027        | 35.86             | 0.27          | 35.68            | 0.28          | 1.3606                                            | 0.0029        |
| Dim-E3-0400 | 40                     | 0.1365  | 0.0001        | 2.07                    | 0.002         | 82.58                             | 0.37          | 0.4133                           | 0.0018        | 1.322                           | 0.0018        | 40.22             | 0.22          | 39.89            | 0.27          | 1.3619                                            | 0.0021        |
| Dim-E3-0510 | 51                     | 0.1711  | 0.0001        | 6.68                    | 0.008         | 32.14                             | 0.15          | 0.4137                           | 0.0019        | 1.2227                          | 0.0015        | 44.43             | 0.26          | 43.50            | 0.49          | 1.2545                                            | 0.0021        |
| Dim-E3-0630 | 63                     | 0.2166  | 0.0001        | 1.68                    | 0.005         | 158.54                            | 1.28          | 0.4043                           | 0.003         | 1.2092                          | 0.0017        | 43.88             | 0.40          | 43.70            | 0.41          | 1.2372                                            | 0.0019        |
| Dim-E3-0760 | 76                     | 0.1901  | 0.0002        | 6.88                    | 0.009         | 37.57                             | 0.13          | 0.448                            | 0.0014        | 1.2573                          | 0.0013        | 47.25             | 0.20          | 46.42            | 0.41          | 1.2962                                            | 0.002         |
| Dim-E3-0920 | 92                     | 0.1759  | 0.0002        | 1.55                    | 0.002         | 159.61                            | 0.65          | 0.4629                           | 0.0019        | 1.2671                          | 0.0016        | 48.71             | 0.26          | 48.51            | 0.28          | 1.3071                                            | 0.0019        |
| Dim-E3-0995 | 99.5                   | 0.2043  | 0.0001        | 3.55                    | 0.004         | 77.87                             | 0.32          | 0.4457                           | 0.0018        | 1.1869                          | 0.001         | 50.63             | 0.26          | 50.21            | 0.32          | 1.2164                                            | 0.0013        |
| Dim-E3-1040 | 104                    | 0.2035  | 0.0001        | 0.61                    | 0.001         | 450.07                            | 2.36          | 0.4475                           | 0.0022        | 1.2031                          | 0.0014        | 49.99             | 0.32          | 49.92            | 0.32          | 1.234                                             | 0.0016        |
| Dim-E3-1220 | 122                    | 0.2097  | 0.0002        | 0.58                    | 0.001         | 560.68                            | 2.33          | 0.5103                           | 0.002         | 1.3405                          | 0.002         | 51.09             | 0.27          | 51.03            | 0.27          | 1.3935                                            | 0.0022        |
| Dim-E3-1250 | 125                    | 0.2827  | 0.0002        | 0.82                    | 0.001         | 611.94                            | 1.4           | 0.5828                           | 0.0011        | 1.4749                          | 0.0015        | 53.22             | 0.14          | 53.16            | 0.14          | 1.5522                                            | 0.0016        |
| Dim-E3-1300 | 130                    | 0.1447  | 0.0001        | 0.87                    | 0.002         | 366.64                            | 2.25          | 0.7226                           | 0.0042        | 1.7196                          | 0.0021        | 56.99             | 0.43          | 56.90            | 0.43          | 1.8463                                            | 0.0025        |
| Dim-E3-1330 | 133                    | 0.0543  | 0.0000        | 1.2                     | 0.002         | 98.69                             | 0.83          | 0.7215                           | 0.006         | 1.6516                          | 0.0021        | 60.02             | 0.65          | 59.64            | 0.66          | 1.7757                                            | 0.0034        |
| Dim-E3-1370 | 137                    | 0.1401  | 0.0001        | 0.39                    | 0.002         | 779.07                            | 5.53          | 0.7125                           | 0.0036        | 1.5742                          | 0.0018        | 63.11             | 0.43          | 63.06            | 0.43          | 1.6867                                            | 0.0022        |
| Dim-E3-1700 | 170                    | 0.1798  | 0.0001        | 0.42                    | 0.001         | 954.21                            | 3.76          | 0.7277                           | 0.0025        | 1.5336                          | 0.0011        | 67.28             | 0.31          | 67.24            | 0.31          | 1.6457                                            | 0.0014        |
| Dim-E3-1950 | 195                    | 0.1578  | 0.0001        | 0.71                    | 0.001         | 538.62                            | 1.94          | 0.8008                           | 0.0026        | 1.6546                          | 0.002         | 68.69             | 0.32          | 68.61            | 0.32          | 1.7957                                            | 0.0023        |
| Dim-E3-2200 | 220                    | 0.1744  | 0.0001        | 0.13                    | 0.001         | 3202.78                           | 16.55         | 0.7673                           | 0.0025        | 1.5768                          | 0.0018        | 69.44             | 0.33          | 69.43            | 0.33          | 1.702                                             | 0.0021        |
| Dim-E3-2430 | 243                    | 0.3062  | 0.0002        | 0.77                    | 0.003         | 926.05                            | 4.85          | 0.7649                           | 0.003         | 1.5324                          | 0.0023        | 72.02             | 0.42          | 71.98            | 0.42          | 1.6529                                            | 0.0027        |
| Dim-E3-2500 | 250                    | 0.5386  | 0.0003        | 0.1                     | 0.001         | 13369                             | 147           | 0.7941                           | 0.0023        | 1.5644                          | 0.001         | 73.47             | 0.30          | 73.47            | 0.30          | 1.6944                                            | 0.0013        |
| Dim-E3-2560 | 256                    | 33.6032 | 0.0245        | 1.865                   | 0.050         | 42397                             | 1147          | 0.7787                           | 0.0021        | 1.4832                          | 0.0009        | 77.42             | 0.30          | 77.42            | 0.30          | 1.6012                                            | 0.0011        |

|             |       |        |        |       |       |        |      |        |        |        |        |       |      |       |      |        |        |
|-------------|-------|--------|--------|-------|-------|--------|------|--------|--------|--------|--------|-------|------|-------|------|--------|--------|
| Dim-E3-2580 | 258   | 3.3317 | 0.0027 | 0.42  | 0.005 | 19598  | 262  | 0.8048 | 0.0024 | 1.5019 | 0.001  | 79.48 | 0.34 | 79.48 | 0.34 | 1.6281 | 0.0013 |
| Dim-E3-2840 | 284   | 0.1732 | 0.0001 | 1.93  | 0.005 | 257.96 | 1.46 | 0.9471 | 0.0049 | 1.6711 | 0.0025 | 85.29 | 0.66 | 85.11 | 0.66 | 1.8562 | 0.0033 |
| Dim-E3-3200 | 320   | 0.284  | 0.0002 | 0.84  | 0.001 | 925.59 | 3.09 | 0.9011 | 0.0026 | 1.5432 | 0.0014 | 89.77 | 0.41 | 89.71 | 0.41 | 1.7005 | 0.0018 |
| Dim-E2-040  | 40    | 0.2707 | 0.0002 | 0.39  | 0.01  | 258.3  | 6.99 | 0.1218 | 0.0013 | 1.3845 | 0.0015 | 10.02 | 0.11 | 9.99  | 0.11 | 1.3957 | 0.0015 |
| Dim-E2-115  | 115   | 0.2636 | 0.0001 | 0.6   | 0.003 | 173.69 | 1.66 | 0.1309 | 0.0011 | 1.4026 | 0.0018 | 10.65 | 0.09 | 10.61 | 0.10 | 1.4151 | 0.0019 |
| Dim-E2-173  | 173   | 0.3733 | 0.0002 | 0.27  | 0.002 | 557.13 | 6.28 | 0.1307 | 0.0011 | 1.3555 | 0.0018 | 11.03 | 0.10 | 11.01 | 0.10 | 1.3668 | 0.0019 |
| Dim-E2-194  | 194   | 0.2927 | 0.0002 | 0.3   | 0.002 | 389.77 | 4.48 | 0.1334 | 0.0013 | 1.3589 | 0.0017 | 11.24 | 0.12 | 11.21 | 0.12 | 1.3706 | 0.0018 |
| Dim-E2-220  | 220   | 0.2695 | 0.0002 | 0.34  | 0.002 | 336.98 | 3.45 | 0.1409 | 0.0012 | 1.4061 | 0.0021 | 11.47 | 0.10 | 11.44 | 0.11 | 1.4196 | 0.0021 |
| Dim-E2-288  | 288   | 0.1262 | 0.0001 | 1.21  | 0.004 | 51.22  | 0.79 | 0.1612 | 0.0024 | 1.3992 | 0.0019 | 13.30 | 0.21 | 13.09 | 0.23 | 1.4154 | 0.0020 |
| Dim-E4-0035 | 3.5   | 0.262  | 0.0002 | 7.81  | 0.015 | 15.36  | 0.09 | 0.1509 | 0.0008 | 1.3656 | 0.0011 | 12.72 | 0.08 | 12.08 | 0.32 | 1.3813 | 0.0019 |
| Dim-E4-0400 | 40    | 0.2705 | 0.0001 | 0.34  | 0.003 | 346.19 | 4.29 | 0.145  | 0.0014 | 1.3768 | 0.0018 | 12.09 | 0.12 | 12.07 | 0.12 | 1.39   | 0.0019 |
| Dim-E4-0950 | 95    | 0.2262 | 0.0001 | 1.99  | 0.004 | 51.32  | 0.3  | 0.1487 | 0.0008 | 1.3448 | 0.0015 | 12.74 | 0.08 | 12.55 | 0.12 | 1.3581 | 0.0016 |
| Dim-E4-1645 | 164.5 | 0.2151 | 0.0001 | 1.2   | 0.002 | 83.63  | 0.55 | 0.1544 | 0.001  | 1.3728 | 0.002  | 12.96 | 0.09 | 12.84 | 0.11 | 1.3872 | 0.0020 |
| Dim-E4-1980 | 198   | 0.1969 | 0.0001 | 0.91  | 0.001 | 102.23 | 0.52 | 0.1561 | 0.0008 | 1.3749 | 0.0014 | 13.09 | 0.07 | 13.00 | 0.08 | 1.3894 | 0.0014 |
| Dim-E4-2360 | 236   | 0.1867 | 0.0001 | 4.93  | 0.005 | 18.9   | 0.1  | 0.1645 | 0.0009 | 1.358  | 0.0015 | 14.02 | 0.08 | 13.45 | 0.29 | 1.3746 | 0.0021 |
| Dim-E4-2635 | 263.5 | 0.1886 | 0.0001 | 9.55  | 0.021 | 10.24  | 0.07 | 0.1709 | 0.0011 | 1.3439 | 0.002  | 14.77 | 0.10 | 13.66 | 0.54 | 1.3625 | 0.0033 |
| Dim-E4-2930 | 293   | 0.1402 | 0.0001 | 6.95  | 0.018 | 11     | 0.14 | 0.1796 | 0.0022 | 1.4193 | 0.0019 | 14.68 | 0.20 | 13.65 | 0.53 | 1.4417 | 0.0036 |
| Dim-E4-3600 | 360   | 0.1322 | 0.0001 | 10.19 | 0.023 | 7.57   | 0.08 | 0.1924 | 0.0021 | 1.3841 | 0.0021 | 16.24 | 0.19 | 14.59 | 0.81 | 1.4088 | 0.0049 |
| Dim-E4-3770 | 377   | 0.1545 | 0.0000 | 6.8   | 0.008 | 12.52  | 0.11 | 0.1817 | 0.0015 | 1.3851 | 0.0012 | 15.26 | 0.14 | 14.32 | 0.47 | 1.4059 | 0.0028 |

**Table S2** Monthly precipitation  $\delta^{18}\text{O}$  and  $\delta\text{D}$  means of GNIP Antalya station (36°52'48" N 30°42' 00" E; 49 m a.s.l.) from 1963-2009<sup>3</sup> **(a)** and average  $\delta^{18}\text{O}$ ,  $\delta\text{D}$ , and precipitation (mm) values for 2009 (most recent data from the station) **(b)**

|           | Months                       | $\delta^{18}\text{O}_{\text{‰}}$<br>(VSMOW)      | $\delta\text{D}_{\text{‰}}$<br>(VSMOW)      | Precipitation<br>(mm)         | Air<br>Temperature<br>(°C) | d-excess<br>value |
|-----------|------------------------------|--------------------------------------------------|---------------------------------------------|-------------------------------|----------------------------|-------------------|
| <b>a)</b> | January                      | -6.23                                            | -32.80                                      | 205.4                         | 9.7                        | 18                |
|           | February                     | -5.91                                            | -30.60                                      | 159.1                         | 10.3                       | 16.5              |
|           | March                        | -4.89                                            | -25.30                                      | 106.9                         | 12.6                       | 14.1              |
|           | April                        | -4.14                                            | -22.40                                      | 56.7                          | 16                         | 11.6              |
|           | May                          | -3.17                                            | -18.20                                      | 29.5                          | 20.4                       | 7.3               |
|           | June                         | -3.36                                            | -20.60                                      | 7.0                           | 25.4                       | 7.5               |
|           | July                         | -4.44                                            | -25.40                                      | 3.1                           | 28.4                       | 11.4              |
|           | August                       | -3.70                                            | -18.80                                      | 2.2                           | 28.1                       | 10.8              |
|           | September                    | -2.55                                            | -10.90                                      | 12.6                          | 24.6                       | 9.5               |
|           | October                      | -4.66                                            | -23.00                                      | 84.1                          | 19.9                       | 15.1              |
|           | November                     | -4.92                                            | -22.10                                      | 150.3                         | 14.7                       | 17                |
|           | December                     | -6.21                                            | -30.50                                      | 260.2                         | 11.2                       | 19.4              |
|           |                              | Lon-term                                         |                                             |                               |                            |                   |
|           | Weighted Annual              | -5.47                                            | -27.58                                      | -                             | -                          | -                 |
|           | Means                        |                                                  |                                             |                               |                            |                   |
|           | Long-term<br>annual<br>means | -4.52                                            | -23.38                                      | 89.76                         | 18.44                      | 13.18             |
| <b>b)</b> | Year                         | Avg. $\delta^{18}\text{O}_{\text{‰}}$<br>(VSMOW) | Avg. $\delta\text{D}_{\text{‰}}$<br>(VSMOW) | Avg.<br>Precipitation<br>(mm) |                            |                   |
|           | 2009                         | -5.59                                            | -29.48                                      | 1513.7                        |                            |                   |



**Table S3**  $\delta^{18}\text{O}$  and  $\delta^{13}\text{C}$  stable isotope ratios of the speleothem sub-samples from the Dim Cave (Alanya, SW Turkey) (values are in per mil: ‰)

| Sample name | Depth (mm) | $\delta^{13}\text{C}$ (VPDB) | $\delta^{18}\text{O}$ (VPDB) | $\delta^{18}\text{O}$ (VSMOW) |
|-------------|------------|------------------------------|------------------------------|-------------------------------|
| Dim-E3-0010 | 1          | -8.371                       | -5.157                       | 25.59                         |
| Dim-E3-0015 | 1.5        | -8.477                       | -5.063                       | 25.69                         |
| Dim-E3-0020 | 2          | -8.001                       | -4.726                       | 26.04                         |
| Dim-E3-0025 | 2.5        | -5.883                       | -4.583                       | 26.19                         |
| Dim-E3-0030 | 3          | -8.265                       | -5.398                       | 25.35                         |
| Dim-E3-0035 | 3.5        | -6.798                       | -4.595                       | 26.17                         |
| Dim-E3-0040 | 4          | -5.818                       | -4.845                       | 25.92                         |
| Dim-E3-0045 | 4.5        | -5.748                       | -4.709                       | 26.06                         |
| Dim-E3-0050 | 5          | -5.165                       | -4.342                       | 26.43                         |
| Dim-E3-0060 | 6          | -6.845                       | -4.912                       | 25.85                         |
| Dim-E3-0065 | 6.5        | -6.534                       | -4.928                       | 25.83                         |
| Dim-E3-0070 | 7          | -5.912                       | -4.832                       | 25.93                         |
| Dim-E3-0075 | 7.5        | -7.325                       | -4.861                       | 25.90                         |
| Dim-E3-0080 | 8          | -6.611                       | -4.802                       | 25.96                         |
| Dim-E3-0085 | 8.5        | -7.196                       | -4.951                       | 25.81                         |
| Dim-E3-0095 | 9          | -6.366                       | -5.113                       | 25.64                         |
| Dim-E3-0100 | 10         | -7.199                       | -5.091                       | 25.66                         |
| Dim-E3-0105 | 10.5       | -7.254                       | -5.343                       | 25.40                         |
| Dim-E3-0110 | 11         | -7.108                       | -5.240                       | 25.51                         |
| Dim-E3-0115 | 11.5       | -7.533                       | -6.220                       | 24.50                         |
| Dim-E3-0125 | 12.5       | -7.537                       | -5.756                       | 24.98                         |
| Dim-E3-0130 | 13         | -6.283                       | -5.057                       | 25.70                         |
| Dim-E3-0135 | 13.5       | -7.418                       | -5.192                       | 25.56                         |
| Dim-E3-0140 | 14         | -5.977                       | -4.950                       | 25.81                         |
| Dim-E3-0145 | 14.5       | -5.683                       | -4.996                       | 25.76                         |
| Dim-E3-0150 | 15         | -5.435                       | -5.024                       | 25.73                         |
| Dim-E3-0155 | 15.5       | -6.010                       | -5.143                       | 25.61                         |
| Dim-E3-0165 | 16.5       | -5.611                       | -4.853                       | 25.91                         |
| Dim-E3-0170 | 17         | -4.669                       | -5.134                       | 25.62                         |
| Dim-E3-0175 | 17.5       | -4.420                       | -4.646                       | 26.12                         |
| Dim-E3-0180 | 18         | -4.900                       | -4.710                       | 26.06                         |
| Dim-E3-0185 | 18.5       | -4.795                       | -5.284                       | 25.46                         |
| Dim-E3-0195 | 19.5       | -4.915                       | -4.485                       | 26.29                         |
| Dim-E3-0200 | 20         | -3.990                       | -4.411                       | 26.36                         |
| Dim-E3-0205 | 20.5       | -4.034                       | -4.870                       | 25.89                         |
| Dim-E3-0210 | 21         | -4.044                       | -4.498                       | 26.27                         |
| Dim-E3-0225 | 22.5       | -4.016                       | -4.525                       | 26.25                         |
| Dim-E3-0240 | 24         | -4.719                       | -4.487                       | 26.28                         |
| Dim-E3-0250 | 25         | -6.491                       | -4.481                       | 26.29                         |
| Dim-E3-0260 | 26         | -6.988                       | -4.340                       | 26.44                         |
| Dim-E3-0265 | 26.5       | -5.705                       | -4.188                       | 26.59                         |
| Dim-E3-0270 | 27         | -5.638                       | -4.093                       | 26.69                         |
| Dim-E3-0275 | 27.5       | -4.892                       | -4.249                       | 26.53                         |
| Dim-E3-0280 | 28         | -6.432                       | -4.306                       | 26.47                         |
| Dim-E3-0290 | 29         | -6.405                       | -4.519                       | 26.25                         |
| Dim-E3-0300 | 30         | -5.635                       | -4.690                       | 26.08                         |
| Dim-E3-0305 | 30.5       | -5.697                       | -4.450                       | 26.32                         |
| Dim-E3-0310 | 31         | -5.711                       | -4.277                       | 26.50                         |
| Dim-E3-0315 | 31.5       | -6.670                       | -4.483                       | 26.29                         |
| Dim-E3-0320 | 32         | -6.584                       | -4.446                       | 26.33                         |
| Dim-E3-0325 | 32.5       | -4.529                       | -4.803                       | 25.96                         |
| Dim-E3-0330 | 33         | -4.219                       | -4.654                       | 26.11                         |
| Dim-E3-0335 | 33.5       | -4.336                       | -4.577                       | 26.19                         |
| Dim-E3-0340 | 34         | -4.864                       | -5.291                       | 25.46                         |
| Dim-E3-0345 | 34.5       | -4.099                       | -4.244                       | 26.53                         |
| Dim-E3-0350 | 35         | -5.406                       | -4.119                       | 26.66                         |
| Dim-E3-0355 | 35.5       | -5.129                       | -4.010                       | 26.78                         |

|             |      |        |        |       |
|-------------|------|--------|--------|-------|
| Dim-E3-0365 | 36.5 | -5.869 | -5.117 | 25.64 |
| Dim-E3-0375 | 37.5 | -4.677 | -4.453 | 26.32 |
| Dim-E3-0380 | 38   | -4.839 | -4.838 | 25.92 |
| Dim-E3-0385 | 38.5 | -4.201 | -4.399 | 26.38 |
| Dim-E3-0390 | 39   | -6.109 | -4.646 | 26.12 |
| Dim-E3-0395 | 39.5 | -5.886 | -4.714 | 26.05 |
| Dim-E3-0400 | 40   | -5.077 | -4.414 | 26.36 |
| Dim-E3-0405 | 40.5 | -6.625 | -4.865 | 25.89 |
| Dim-E3-0410 | 41   | -5.094 | -4.818 | 25.94 |
| Dim-E3-0415 | 41.5 | -5.277 | -5.183 | 25.57 |
| Dim-E3-0425 | 42.5 | -6.611 | -4.731 | 26.03 |
| Dim-E3-0430 | 43   | -5.982 | -4.380 | 26.40 |
| Dim-E3-0435 | 43.5 | -6.031 | -4.637 | 26.13 |
| Dim-E3-0440 | 44   | -7.015 | -4.996 | 25.76 |
| Dim-E3-0445 | 44.5 | -7.215 | -4.799 | 25.96 |
| Dim-E3-0455 | 45.5 | -6.191 | -4.583 | 26.19 |
| Dim-E3-0460 | 46   | -6.369 | -4.502 | 26.27 |
| Dim-E3-0465 | 46.5 | -5.957 | -4.564 | 26.21 |
| Dim-E3-0470 | 47   | -7.493 | -4.766 | 26.00 |
| Dim-E3-0475 | 47.5 | -7.376 | -4.584 | 26.18 |
| Dim-E3-0480 | 48   | -7.318 | -4.880 | 25.88 |
| Dim-E3-0485 | 48.5 | -7.021 | -4.738 | 26.03 |
| Dim-E3-0490 | 49   | -7.938 | -4.960 | 25.80 |
| Dim-E3-0500 | 50   | -7.886 | -5.036 | 25.72 |
| Dim-E3-0505 | 50.5 | -6.846 | -4.889 | 25.87 |
| Dim-E3-0510 | 51   | -7.832 | -4.994 | 25.76 |
| Dim-E3-0515 | 51.5 | -8.072 | -4.946 | 25.81 |
| Dim-E3-0520 | 52   | -7.424 | -4.886 | 25.87 |
| Dim-E3-0525 | 52.5 | -8.058 | -4.996 | 25.76 |
| Dim-E3-0530 | 53   | -8.486 | -5.371 | 25.37 |
| Dim-E3-0535 | 53.5 | -8.057 | -4.938 | 25.82 |
| Dim-E3-0540 | 54   | -7.541 | -5.530 | 25.21 |
| Dim-E3-0545 | 54.5 | -7.748 | -5.564 | 25.17 |
| Dim-E3-0550 | 55   | -7.673 | -5.746 | 24.99 |
| Dim-E3-0555 | 55.5 | -7.715 | -5.613 | 25.12 |
| Dim-E3-0560 | 56   | -7.647 | -5.389 | 25.35 |
| Dim-E3-0565 | 56.5 | -8.015 | -5.542 | 25.20 |
| Dim-E3-0570 | 57   | -7.573 | -5.461 | 25.28 |
| Dim-E3-0575 | 57.5 | -8.034 | -5.360 | 25.39 |
| Dim-E3-0580 | 58   | -8.403 | -5.366 | 25.38 |
| Dim-E3-0585 | 58.5 | -8.419 | -5.332 | 25.41 |
| Dim-E3-0590 | 59   | -8.838 | -5.552 | 25.19 |
| Dim-E3-0595 | 59.5 | -8.482 | -5.334 | 25.41 |
| Dim-E3-0600 | 60   | -8.780 | -5.219 | 25.53 |
| Dim-E3-0610 | 61   | -9.125 | -5.655 | 25.08 |
| Dim-E3-0615 | 61.5 | -8.876 | -5.423 | 25.32 |
| Dim-E3-0620 | 62   | -8.797 | -5.318 | 25.43 |
| Dim-E3-0625 | 62.5 | -9.221 | -5.951 | 24.78 |
| Dim-E3-0630 | 63   | -8.347 | -5.446 | 25.30 |
| Dim-E3-0640 | 64   | -8.489 | -5.535 | 25.20 |
| Dim-E3-0650 | 65   | -8.809 | -5.790 | 24.94 |
| Dim-E3-0660 | 66   | -8.612 | -5.830 | 24.90 |
| Dim-E3-0670 | 67   | -8.634 | -5.481 | 25.26 |
| Dim-E3-0680 | 68   | -8.901 | -5.562 | 25.18 |
| Dim-E3-0690 | 69   | -8.845 | -5.548 | 25.19 |
| Dim-E3-0700 | 70   | -8.814 | -5.108 | 25.64 |
| Dim-E3-0710 | 71   | -8.945 | -5.695 | 25.04 |
| Dim-E3-0720 | 72   | -8.612 | -5.476 | 25.27 |
| Dim-E3-0730 | 73   | -8.690 | -5.620 | 25.12 |
| Dim-E3-0740 | 74   | -8.666 | -5.714 | 25.02 |
| Dim-E3-0750 | 75   | -7.716 | -5.536 | 25.20 |

|             |       |        |        |       |
|-------------|-------|--------|--------|-------|
| Dim-E3-0760 | 76    | -7.502 | -5.272 | 25.48 |
| Dim-E3-0770 | 77    | -8.529 | -5.456 | 25.29 |
| Dim-E3-0780 | 78    | -8.728 | -5.465 | 25.28 |
| Dim-E3-0790 | 79    | -7.528 | -5.225 | 25.52 |
| Dim-E3-0800 | 80    | -7.617 | -5.085 | 25.67 |
| Dim-E3-0805 | 80.5  | -7.489 | -4.945 | 25.81 |
| Dim-E3-0810 | 81    | -8.186 | -5.196 | 25.55 |
| Dim-E3-0820 | 82    | -7.767 | -4.822 | 25.94 |
| Dim-E3-0830 | 83    | -7.716 | -4.903 | 25.86 |
| Dim-E3-0840 | 84    | -7.988 | -4.967 | 25.79 |
| Dim-E3-0850 | 85    | -7.668 | -5.130 | 25.62 |
| Dim-E3-0860 | 86    | -6.968 | -4.704 | 26.06 |
| Dim-E3-0870 | 87    | -7.281 | -4.677 | 26.09 |
| Dim-E3-0880 | 88    | -8.229 | -4.745 | 26.02 |
| Dim-E3-0890 | 89    | -7.480 | -4.580 | 26.19 |
| Dim-E3-0900 | 90    | -6.258 | -4.406 | 26.37 |
| Dim-E3-0910 | 91    | -5.697 | -4.287 | 26.49 |
| Dim-E3-0915 | 91.5  | -5.745 | -4.112 | 26.67 |
| Dim-E3-0920 | 92    | -5.057 | -4.155 | 26.63 |
| Dim-E3-0925 | 92.5  | -4.650 | -4.713 | 26.05 |
| Dim-E3-0930 | 93    | -5.385 | -4.431 | 26.34 |
| Dim-E3-0935 | 93.5  | -6.501 | -5.211 | 25.54 |
| Dim-E3-0940 | 94    | -6.404 | -4.308 | 26.47 |
| Dim-E3-0945 | 94.5  | -7.186 | -4.528 | 26.24 |
| Dim-E3-0950 | 95    | -8.680 | -4.973 | 25.78 |
| Dim-E3-0955 | 95.5  | -10.28 | -5.818 | 24.91 |
| Dim-E3-0960 | 96    | -9.427 | -5.037 | 25.72 |
| Dim-E3-0965 | 96.5  | -10.61 | -6.057 | 24.67 |
| Dim-E3-0970 | 97    | -10.34 | -5.767 | 24.97 |
| Dim-E3-0975 | 97.5  | -10.59 | -5.723 | 25.01 |
| Dim-E3-0980 | 98    | -10.42 | -6.047 | 24.68 |
| Dim-E3-0985 | 98.5  | -9.857 | -5.578 | 25.16 |
| Dim-E3-0995 | 99.5  | -9.789 | -5.622 | 25.11 |
| Dim-E3-1000 | 100   | -6.586 | -4.804 | 25.96 |
| Dim-E3-1005 | 100.5 | -6.675 | -4.627 | 26.14 |
| Dim-E3-1010 | 101   | -6.855 | -4.679 | 26.09 |
| Dim-E3-1015 | 101.5 | -7.864 | -4.855 | 25.91 |
| Dim-E3-1020 | 102   | -8.613 | -5.136 | 25.62 |
| Dim-E3-1025 | 102.5 | -8.264 | -5.080 | 25.67 |
| Dim-E3-1030 | 103   | -7.970 | -5.059 | 25.70 |
| Dim-E3-1035 | 103.5 | -5.969 | -4.461 | 26.31 |
| Dim-E3-1040 | 104   | -6.717 | -4.963 | 25.79 |
| Dim-E3-1050 | 105   | -7.606 | -5.110 | 25.64 |
| Dim-E3-1055 | 105.5 | -6.925 | -4.908 | 25.85 |
| Dim-E3-1060 | 106   | -6.724 | -4.832 | 25.93 |
| Dim-E3-1065 | 106.5 | -6.333 | -4.863 | 25.90 |
| Dim-E3-1070 | 107   | -7.166 | -4.958 | 25.80 |
| Dim-E3-1075 | 107.5 | -6.816 | -5.159 | 25.59 |
| Dim-E3-1080 | 108   | -6.775 | -4.916 | 25.84 |
| Dim-E3-1085 | 108.5 | -6.752 | -4.830 | 25.93 |
| Dim-E3-1095 | 109   | -6.182 | -4.607 | 26.16 |
| Dim-E3-1100 | 110   | -6.185 | -4.561 | 26.21 |
| Dim-E3-1105 | 110.5 | -6.116 | -4.774 | 25.99 |
| Dim-E3-1110 | 111   | -6.450 | -4.828 | 25.93 |
| Dim-E3-1115 | 111.5 | -6.968 | -4.917 | 25.84 |
| Dim-E3-1120 | 112   | -6.911 | -4.932 | 25.83 |
| Dim-E3-1125 | 112.5 | -7.332 | -4.824 | 25.94 |
| Dim-E3-1130 | 113   | -7.763 | -4.969 | 25.79 |
| Dim-E3-1135 | 113.5 | -7.636 | -4.768 | 25.99 |
| Dim-E3-1140 | 114   | -7.535 | -4.598 | 26.17 |
| Dim-E3-1145 | 114.5 | -7.624 | -4.627 | 26.14 |



|             |       |        |        |       |
|-------------|-------|--------|--------|-------|
| Dim-E3-1150 | 115   | -7.428 | -4.767 | 26.00 |
| Dim-E3-1155 | 115.5 | -7.822 | -4.964 | 25.79 |
| Dim-E3-1160 | 116   | -7.563 | -4.806 | 25.96 |
| Dim-E3-1165 | 116.5 | -7.429 | -4.910 | 25.85 |
| Dim-E3-1170 | 117   | -7.848 | -5.251 | 25.50 |
| Dim-E3-1175 | 117.5 | -7.721 | -5.230 | 25.52 |
| Dim-E3-1180 | 118   | -8.510 | -5.484 | 25.26 |
| Dim-E3-1185 | 118.5 | -8.510 | -5.539 | 25.20 |
| Dim-E3-1190 | 119   | -8.549 | -5.453 | 25.29 |
| Dim-E3-1200 | 120   | -8.095 | -5.322 | 25.42 |
| Dim-E3-1205 | 120.5 | -8.183 | -5.131 | 25.62 |
| Dim-E3-1210 | 121   | -9.236 | -5.720 | 25.01 |
| Dim-E3-1215 | 121.5 | -8.470 | -5.552 | 25.19 |
| Dim-E3-1220 | 122   | -8.428 | -5.543 | 25.20 |
| Dim-E3-1225 | 122.5 | -8.391 | -5.780 | 24.95 |
| Dim-E3-1230 | 123   | -6.470 | -4.996 | 25.76 |
| Dim-E3-1235 | 123.5 | -7.238 | -5.259 | 25.49 |
| Dim-E3-1240 | 124   | -4.557 | -4.576 | 26.19 |
| Dim-E3-1245 | 124.5 | -4.085 | -4.538 | 26.23 |
| Dim-E3-1250 | 125   | -4.319 | -4.358 | 26.42 |
| Dim-E3-1255 | 125.5 | -3.706 | -4.241 | 26.54 |
| Dim-E3-1260 | 126   | -4.548 | -4.334 | 26.44 |
| Dim-E3-1265 | 126.5 | -4.767 | -4.466 | 26.31 |
| Dim-E3-1270 | 127   | -3.666 | -4.272 | 26.51 |
| Dim-E3-1275 | 127.5 | -3.723 | -4.266 | 26.51 |
| Dim-E3-1280 | 128   | -4.673 | -4.755 | 26.01 |
| Dim-E3-1285 | 128.5 | -5.272 | -5.224 | 25.53 |
| Dim-E3-1290 | 129   | -4.763 | -5.088 | 25.67 |
| Dim-E3-1295 | 129.5 | -6.584 | -5.804 | 24.93 |
| Dim-E3-1300 | 130   | -6.207 | -5.536 | 25.20 |
| Dim-E3-1305 | 130.5 | -5.655 | -5.473 | 25.27 |
| Dim-E3-1310 | 131   | -4.917 | -5.211 | 25.54 |
| Dim-E3-1315 | 131.5 | -4.143 | -4.753 | 26.01 |
| Dim-E3-1320 | 132   | -1.798 | -5.360 | 25.38 |
| Dim-E3-1325 | 132.5 | -1.295 | -4.090 | 26.69 |
| Dim-E3-1330 | 133   | -0.311 | -3.658 | 27.14 |
| Dim-E3-1335 | 133.5 | -0.218 | -3.708 | 27.09 |
| Dim-E3-1340 | 134   | -2.928 | -3.967 | 26.82 |
| Dim-E3-1345 | 134.5 | -3.313 | -4.021 | 26.76 |
| Dim-E3-1350 | 135   | -2.783 | -4.030 | 26.76 |
| Dim-E3-1355 | 135.5 | -3.781 | -4.443 | 26.33 |
| Dim-E3-1360 | 136   | -5.329 | -5.054 | 25.70 |
| Dim-E3-1365 | 136.5 | -3.465 | -3.960 | 26.83 |
| Dim-E3-1370 | 137   | -4.074 | -4.417 | 26.36 |
| Dim-E3-1375 | 137.5 | -5.168 | -4.327 | 26.45 |
| Dim-E3-1380 | 138   | -5.432 | -4.392 | 26.38 |
| Dim-E3-1390 | 139   | -5.166 | -4.177 | 26.60 |
| Dim-E3-1400 | 140   | -5.302 | -4.472 | 26.30 |
| Dim-E3-1410 | 141   | -4.829 | -4.303 | 26.47 |
| Dim-E3-1420 | 142   | -4.967 | -4.356 | 26.42 |
| Dim-E3-1430 | 143   | -4.582 | -4.340 | 26.44 |
| Dim-E3-1440 | 144   | -5.114 | -4.089 | 26.69 |
| Dim-E3-1450 | 145   | -6.346 | -4.342 | 26.43 |
| Dim-E3-1460 | 146   | -6.482 | -4.319 | 26.46 |
| Dim-E3-1470 | 147   | -5.323 | -4.097 | 26.69 |
| Dim-E3-1480 | 148   | -5.279 | -4.213 | 26.57 |
| Dim-E3-1490 | 149   | -5.619 | -4.135 | 26.65 |
| Dim-E3-1500 | 150   | -5.643 | -4.086 | 26.70 |
| Dim-E3-1510 | 151   | -3.847 | -4.199 | 26.58 |
| Dim-E3-1520 | 152   | -5.394 | -4.131 | 26.65 |
| Dim-E3-1530 | 153   | -4.719 | -3.939 | 26.85 |

|             |     |        |        |       |
|-------------|-----|--------|--------|-------|
| Dim-E3-1540 | 154 | -5.963 | -4.283 | 26.50 |
| Dim-E3-1550 | 155 | -6.781 | -4.665 | 26.10 |
| Dim-E3-1560 | 156 | -7.505 | -4.708 | 26.06 |
| Dim-E3-1570 | 157 | -8.402 | -5.053 | 25.70 |
| Dim-E3-1580 | 158 | -8.891 | -5.160 | 25.59 |
| Dim-E3-1590 | 159 | -8.598 | -4.777 | 25.99 |
| Dim-E3-1600 | 160 | -7.774 | -4.529 | 26.24 |
| Dim-E3-1610 | 161 | -8.084 | -4.731 | 26.03 |
| Dim-E3-1620 | 162 | -8.147 | -4.696 | 26.07 |
| Dim-E3-1630 | 163 | -7.888 | -4.680 | 26.09 |
| Dim-E3-1640 | 164 | -8.258 | -4.470 | 26.30 |
| Dim-E3-1650 | 165 | -8.235 | -4.597 | 26.17 |
| Dim-E3-1660 | 166 | -8.096 | -4.673 | 26.09 |
| Dim-E3-1670 | 167 | -8.123 | -4.742 | 26.02 |
| Dim-E3-1680 | 168 | -8.070 | -4.711 | 26.05 |
| Dim-E3-1690 | 169 | -8.291 | -5.002 | 25.75 |
| Dim-E3-1700 | 170 | -8.895 | -4.649 | 26.12 |
| Dim-E3-1710 | 171 | -8.661 | -4.758 | 26.01 |
| Dim-E3-1720 | 172 | -8.198 | -4.705 | 26.06 |
| Dim-E3-1730 | 173 | -8.417 | -5.069 | 25.69 |
| Dim-E3-1740 | 174 | -8.434 | -4.832 | 25.93 |
| Dim-E3-1750 | 175 | -8.709 | -4.977 | 25.78 |
| Dim-E3-1760 | 176 | -8.584 | -4.768 | 26.00 |
| Dim-E3-1770 | 177 | -8.546 | -4.960 | 25.80 |
| Dim-E3-1780 | 178 | -8.046 | -4.760 | 26.00 |
| Dim-E3-1790 | 179 | -8.808 | -5.070 | 25.68 |
| Dim-E3-1800 | 180 | -8.916 | -5.000 | 25.76 |
| Dim-E3-1810 | 181 | -9.124 | -4.923 | 25.84 |
| Dim-E3-1820 | 182 | -8.962 | -4.828 | 25.93 |
| Dim-E3-1830 | 183 | -9.039 | -4.890 | 25.87 |
| Dim-E3-1840 | 184 | -8.837 | -4.769 | 25.99 |
| Dim-E3-1850 | 185 | -8.714 | -4.734 | 26.03 |
| Dim-E3-1860 | 186 | -8.735 | -4.514 | 26.26 |
| Dim-E3-1870 | 187 | -8.913 | -4.440 | 26.33 |
| Dim-E3-1880 | 188 | -9.048 | -4.626 | 26.14 |
| Dim-E3-1890 | 189 | -8.954 | -4.514 | 26.26 |
| Dim-E3-1900 | 190 | -9.011 | -4.401 | 26.37 |
| Dim-E3-1910 | 191 | -9.104 | -4.633 | 26.13 |
| Dim-E3-1920 | 192 | -8.975 | -4.512 | 26.26 |
| Dim-E3-1930 | 193 | -8.934 | -4.514 | 26.26 |
| Dim-E3-1940 | 194 | -8.846 | -4.641 | 26.13 |
| Dim-E3-1950 | 195 | -8.071 | -4.367 | 26.41 |
| Dim-E3-1960 | 196 | -8.698 | -4.346 | 26.43 |
| Dim-E3-1970 | 197 | -7.817 | -4.457 | 26.32 |
| Dim-E3-1980 | 198 | -7.758 | -4.429 | 26.34 |
| Dim-E3-1990 | 199 | -7.250 | -4.270 | 26.51 |
| Dim-E3-2000 | 200 | -7.986 | -4.197 | 26.58 |
| Dim-E3-2010 | 201 | -8.348 | -4.250 | 26.53 |
| Dim-E3-2020 | 202 | -8.389 | -4.755 | 26.01 |
| Dim-E3-2030 | 203 | -8.602 | -4.794 | 25.97 |
| Dim-E3-2040 | 204 | -9.497 | -5.522 | 25.22 |
| Dim-E3-2050 | 205 | -9.357 | -4.750 | 26.01 |
| Dim-E3-2060 | 206 | -9.013 | -4.910 | 25.85 |
| Dim-E3-2070 | 207 | -9.100 | -4.894 | 25.86 |
| Dim-E3-2080 | 208 | -8.749 | -4.650 | 26.12 |
| Dim-E3-2090 | 209 | -8.405 | -4.743 | 26.02 |
| Dim-E3-2100 | 210 | -7.962 | -4.670 | 26.10 |
| Dim-E3-2110 | 211 | -8.250 | -4.613 | 26.15 |
| Dim-E3-2120 | 212 | -8.426 | -4.483 | 26.29 |
| Dim-E3-2130 | 213 | -7.780 | -4.172 | 26.61 |
| Dim-E3-2140 | 214 | -7.788 | -4.184 | 26.60 |

|             |       |        |        |       |
|-------------|-------|--------|--------|-------|
| Dim-E3-2150 | 215   | -9.086 | -4.723 | 26.04 |
| Dim-E3-2160 | 216   | -9.800 | -4.865 | 25.90 |
| Dim-E3-2170 | 217   | -9.853 | -4.854 | 25.91 |
| Dim-E3-2180 | 218   | -9.077 | -4.679 | 26.09 |
| Dim-E3-2190 | 219   | -7.581 | -4.244 | 26.54 |
| Dim-E3-2200 | 220   | -7.346 | -4.080 | 26.70 |
| Dim-E3-2210 | 221   | -7.836 | -4.246 | 26.53 |
| Dim-E3-2220 | 222   | -9.145 | -4.842 | 25.92 |
| Dim-E3-2230 | 223   | -8.975 | -4.654 | 26.11 |
| Dim-E3-2240 | 224   | -8.540 | -4.478 | 26.29 |
| Dim-E3-2250 | 225   | -8.255 | -4.435 | 26.34 |
| Dim-E3-2260 | 226   | -8.999 | -4.926 | 25.83 |
| Dim-E3-2270 | 227   | -9.308 | -4.961 | 25.80 |
| Dim-E3-2280 | 228   | -9.672 | -4.986 | 25.77 |
| Dim-E3-2290 | 229   | -9.673 | -5.114 | 25.64 |
| Dim-E3-2300 | 230   | -9.685 | -5.203 | 25.55 |
| Dim-E3-2310 | 231   | -6.978 | -4.119 | 26.66 |
| Dim-E3-2320 | 232   | -6.191 | -4.068 | 26.72 |
| Dim-E3-2330 | 233   | -6.205 | -3.908 | 26.88 |
| Dim-E3-2340 | 234   | -7.764 | -5.282 | 25.47 |
| Dim-E3-2350 | 235   | -8.267 | -4.429 | 26.34 |
| Dim-E3-2360 | 236   | -8.535 | -4.308 | 26.47 |
| Dim-E3-2370 | 237   | -8.436 | -4.386 | 26.39 |
| Dim-E3-2380 | 238   | -7.520 | -4.048 | 26.74 |
| Dim-E3-2390 | 239   | -8.094 | -4.340 | 26.44 |
| Dim-E3-2400 | 240   | -8.497 | -4.427 | 26.35 |
| Dim-E3-2410 | 241   | -9.647 | -4.909 | 25.85 |
| Dim-E3-2420 | 242   | -9.871 | -4.650 | 26.12 |
| Dim-E3-2430 | 243   | -9.003 | -5.129 | 25.62 |
| Dim-E3-2440 | 244   | -6.281 | -3.901 | 26.89 |
| Dim-E3-2445 | 244.5 | -7.001 | -4.194 | 26.59 |
| Dim-E3-2450 | 245   | -7.884 | -4.363 | 26.41 |
| Dim-E3-2455 | 245.5 | -7.022 | -4.350 | 26.43 |
| Dim-E3-2460 | 246   | -7.052 | -4.116 | 26.67 |
| Dim-E3-2465 | 246.5 | -7.406 | -4.207 | 26.57 |
| Dim-E3-2470 | 247   | -6.936 | -4.032 | 26.75 |
| Dim-E3-2475 | 247.5 | -7.757 | -4.069 | 26.72 |
| Dim-E3-2480 | 248   | -7.823 | -4.114 | 26.67 |
| Dim-E3-2485 | 248.5 | -8.156 | -4.701 | 26.06 |
| Dim-E3-2490 | 249   | -8.304 | -4.889 | 25.87 |
| Dim-E3-2495 | 249.5 | -8.718 | -4.809 | 25.95 |
| Dim-E3-2500 | 250   | -8.911 | -5.098 | 25.65 |
| Dim-E3-2505 | 250.5 | -8.622 | -5.156 | 25.60 |
| Dim-E3-2510 | 251   | -8.295 | -4.716 | 26.05 |
| Dim-E3-2515 | 251.5 | -8.216 | -4.360 | 26.42 |
| Dim-E3-2520 | 252   | -8.835 | -4.263 | 26.52 |
| Dim-E3-2525 | 252.5 | -8.122 | -3.934 | 26.85 |
| Dim-E3-2530 | 253   | -6.733 | -3.874 | 26.92 |
| Dim-E3-2535 | 253.5 | -5.096 | -3.652 | 27.15 |
| Dim-E3-2540 | 254   | -6.382 | -3.552 | 27.25 |
| Dim-E3-2550 | 255   | -5.942 | -3.455 | 27.35 |
| Dim-E3-2555 | 255.5 | -5.238 | -3.531 | 27.27 |
| Dim-E3-2560 | 256   | -4.706 | -3.653 | 27.14 |
| Dim-E3-2565 | 256.5 | -6.061 | -3.954 | 26.83 |
| Dim-E3-2570 | 257   | -6.189 | -3.885 | 26.91 |
| Dim-E3-2575 | 257.5 | -8.241 | -4.869 | 25.89 |
| Dim-E3-2580 | 258   | -9.066 | -5.038 | 25.72 |
| Dim-E3-2585 | 258.5 | -7.119 | -4.755 | 26.01 |
| Dim-E3-2590 | 259   | -7.392 | -4.842 | 25.92 |
| Dim-E3-2595 | 259.5 | -7.235 | -4.898 | 25.86 |
| Dim-E3-2600 | 260   | -6.864 | -5.535 | 25.20 |



|             |       |        |        |       |
|-------------|-------|--------|--------|-------|
| Dim-E3-2605 | 260.5 | -7.701 | -6.048 | 24.68 |
| Dim-E3-2610 | 261   | -7.735 | -5.491 | 25.25 |
| Dim-E3-2615 | 261.5 | -7.414 | -5.672 | 25.06 |
| Dim-E3-2620 | 262   | -7.123 | -5.504 | 25.24 |
| Dim-E3-2625 | 262.5 | -7.358 | -5.522 | 25.22 |
| Dim-E3-2630 | 263   | -7.444 | -5.428 | 25.31 |
| Dim-E3-2635 | 263.5 | -7.324 | -5.388 | 25.36 |
| Dim-E3-2640 | 264   | -7.183 | -5.209 | 25.54 |
| Dim-E3-2645 | 264.5 | -7.283 | -5.200 | 25.55 |
| Dim-E3-2650 | 265   | -8.658 | -5.620 | 25.12 |
| Dim-E3-2655 | 265.5 | -9.038 | -5.670 | 25.07 |
| Dim-E3-2660 | 266   | -8.758 | -5.832 | 24.90 |
| Dim-E3-2665 | 266.5 | -8.818 | -5.774 | 24.96 |
| Dim-E3-2670 | 267   | -8.952 | -5.785 | 24.95 |
| Dim-E3-2675 | 267.5 | -9.066 | -5.846 | 24.88 |
| Dim-E3-2680 | 268   | -8.842 | -5.961 | 24.77 |
| Dim-E3-2690 | 269   | -8.937 | -6.022 | 24.70 |
| Dim-E3-2695 | 269.5 | -7.367 | -5.221 | 25.53 |
| Dim-E3-2700 | 270   | -7.332 | -5.266 | 25.48 |
| Dim-E3-2705 | 270.5 | -7.896 | -5.632 | 25.10 |
| Dim-E3-2710 | 271   | -7.875 | -5.584 | 25.15 |
| Dim-E3-2715 | 271.5 | -8.263 | -5.617 | 25.12 |
| Dim-E3-2720 | 272   | -8.465 | -5.443 | 25.30 |
| Dim-E3-2725 | 272.5 | -8.425 | -5.566 | 25.17 |
| Dim-E3-2730 | 273   | -8.416 | -5.453 | 25.29 |
| Dim-E3-2735 | 273.5 | -8.551 | -5.587 | 25.15 |
| Dim-E3-2740 | 274   | -8.674 | -5.987 | 24.74 |
| Dim-E3-2745 | 274.5 | -8.834 | -6.060 | 24.66 |
| Dim-E3-2750 | 275   | -8.719 | -5.881 | 24.85 |
| Dim-E3-2755 | 275.5 | -8.776 | -5.608 | 25.13 |
| Dim-E3-2760 | 276   | -8.758 | -5.485 | 25.26 |
| Dim-E3-2765 | 276.5 | -8.777 | -5.500 | 25.24 |
| Dim-E3-2770 | 277   | -8.723 | -5.716 | 25.02 |
| Dim-E3-2775 | 277.5 | -9.091 | -5.928 | 24.80 |
| Dim-E3-2780 | 278   | -8.813 | -5.617 | 25.12 |
| Dim-E3-2785 | 278.5 | -8.806 | -5.820 | 24.91 |
| Dim-E3-2790 | 279   | -8.821 | -5.734 | 25.00 |
| Dim-E3-2800 | 280   | -8.984 | -5.997 | 24.73 |
| Dim-E3-2805 | 280.5 | -9.116 | -5.996 | 24.73 |
| Dim-E3-2810 | 281   | -9.214 | -6.097 | 24.63 |
| Dim-E3-2815 | 281.5 | -8.893 | -6.159 | 24.56 |
| Dim-E3-2820 | 282   | -9.230 | -6.085 | 24.64 |
| Dim-E3-2830 | 283   | -8.669 | -5.641 | 25.10 |
| Dim-E3-2840 | 284   | -8.954 | -6.083 | 24.64 |
| Dim-E3-2850 | 285   | -8.724 | -5.796 | 24.94 |
| Dim-E3-2860 | 286   | -8.679 | -5.894 | 24.83 |
| Dim-E3-2870 | 287   | -8.609 | -5.468 | 25.27 |
| Dim-E3-2880 | 288   | -8.132 | -5.757 | 24.98 |
| Dim-E3-2890 | 289   | -8.123 | -5.704 | 25.03 |
| Dim-E3-2900 | 290   | -7.179 | -5.280 | 25.47 |
| Dim-E3-2910 | 291   | -7.449 | -5.296 | 25.45 |
| Dim-E3-2920 | 292   | -8.055 | -5.338 | 25.41 |
| Dim-E3-2930 | 293   | -8.096 | -5.385 | 25.36 |
| Dim-E3-2940 | 294   | -7.584 | -5.231 | 25.52 |
| Dim-E3-2950 | 295   | -7.531 | -5.187 | 25.56 |
| Dim-E3-2960 | 296   | -8.092 | -5.501 | 25.24 |
| Dim-E3-2970 | 297   | -7.650 | -5.207 | 25.54 |
| Dim-E3-2980 | 298   | -7.887 | -5.263 | 25.48 |
| Dim-E3-2990 | 299   | -7.927 | -5.271 | 25.48 |
| Dim-E3-3000 | 300   | -7.237 | -5.045 | 25.71 |
| Dim-E3-3010 | 301   | -7.618 | -5.119 | 25.63 |

|             |     |        |        |       |
|-------------|-----|--------|--------|-------|
| Dim-E3-3020 | 302 | -7.477 | -4.925 | 25.83 |
| Dim-E3-3030 | 303 | -6.993 | -4.809 | 25.95 |
| Dim-E3-3040 | 304 | -7.777 | -5.089 | 25.66 |
| Dim-E3-3050 | 305 | -7.765 | -5.048 | 25.71 |
| Dim-E3-3060 | 306 | -7.528 | -4.805 | 25.96 |
| Dim-E3-3070 | 307 | -7.942 | -5.147 | 25.60 |
| Dim-E3-3080 | 308 | -9.042 | -5.348 | 25.40 |
| Dim-E3-3090 | 309 | -9.198 | -5.494 | 25.25 |
| Dim-E3-3100 | 310 | -9.221 | -5.349 | 25.40 |
| Dim-E3-3110 | 311 | -8.646 | -5.439 | 25.30 |
| Dim-E3-3120 | 312 | -8.667 | -5.371 | 25.37 |
| Dim-E3-3130 | 313 | -8.722 | -5.284 | 25.46 |
| Dim-E3-3140 | 314 | -8.611 | -5.286 | 25.46 |
| Dim-E3-3150 | 315 | -9.299 | -5.717 | 25.02 |
| Dim-E3-3160 | 316 | -9.633 | -5.695 | 25.04 |
| Dim-E3-3170 | 317 | -9.702 | -6.036 | 24.69 |
| Dim-E3-3180 | 318 | -9.812 | -6.017 | 24.71 |
| Dim-E3-3190 | 319 | -9.480 | -5.635 | 25.10 |
| Dim-E3-3200 | 320 | -8.779 | -5.499 | 25.24 |
| <hr/>       |     |        |        |       |
| Dim-E2-010  | 10  | -9.709 | -6.095 | 24.63 |
| Dim-E2-013  | 13  | -11.51 | -6.233 | 24.48 |
| Dim-E2-016  | 16  | -11.14 | -6.764 | 23.94 |
| Dim-E2-019  | 19  | -11.19 | -6.472 | 24.24 |
| Dim-E2-022  | 22  | -11.63 | -6.804 | 23.90 |
| Dim-E2-025  | 25  | -10.63 | -6.403 | 24.31 |
| Dim-E2-028  | 28  | -11.74 | -6.814 | 23.89 |
| Dim-E2-031  | 31  | -11.29 | -6.528 | 24.18 |
| Dim-E2-034  | 34  | -11.05 | -6.391 | 24.32 |
| Dim-E2-037  | 37  | -11.35 | -6.260 | 24.46 |
| Dim-E2-040  | 40  | -11.14 | -6.617 | 24.09 |
| Dim-E2-043  | 43  | -11.63 | -6.580 | 24.13 |
| Dim-E2-046  | 46  | -11.31 | -6.536 | 24.17 |
| Dim-E2-049  | 49  | -11.58 | -6.216 | 24.50 |
| Dim-E2-052  | 52  | -11.83 | -6.665 | 24.04 |
| Dim-E2-055  | 55  | -11.65 | -6.454 | 24.26 |
| Dim-E2-058  | 58  | -11.56 | -5.960 | 24.77 |
| Dim-E2-061  | 61  | -11.67 | -6.546 | 24.16 |
| Dim-E2-065  | 64  | -11.58 | -6.077 | 24.65 |
| Dim-E2-067  | 67  | -11.24 | -6.175 | 24.54 |
| Dim-E2-070  | 70  | -12.11 | -6.531 | 24.18 |
| Dim-E2-073  | 73  | -11.81 | -5.985 | 24.74 |
| Dim-E2-076  | 76  | -11.68 | -6.147 | 24.57 |
| Dim-E2-079  | 79  | -11.52 | -6.209 | 24.51 |
| Dim-E2-082  | 82  | -11.72 | -6.151 | 24.57 |
| Dim-E2-085  | 85  | -11.76 | -5.747 | 24.99 |
| Dim-E2-088  | 88  | -11.30 | -5.825 | 24.91 |
| Dim-E2-091  | 91  | -11.04 | -6.166 | 24.55 |
| Dim-E2-094  | 94  | -10.92 | -5.921 | 24.81 |
| Dim-E2-097  | 97  | -11.51 | -5.971 | 24.76 |
| Dim-E2-100  | 100 | -12.07 | -6.431 | 24.28 |
| Dim-E2-103  | 103 | -11.64 | -6.038 | 24.69 |
| Dim-E2-106  | 106 | -12.10 | -6.387 | 24.33 |
| Dim-E2-109  | 109 | -11.47 | -6.210 | 24.51 |
| Dim-E2-112  | 112 | -11.46 | -5.954 | 24.77 |
| Dim-E2-115  | 115 | -11.19 | -6.129 | 24.59 |
| Dim-E2-118  | 118 | -11.16 | -5.616 | 25.12 |
| Dim-E2-121  | 121 | -11.11 | -5.988 | 24.74 |
| Dim-E2-124  | 124 | -11.08 | -5.810 | 24.92 |
| Dim-E2-127  | 127 | -10.98 | -5.856 | 24.87 |
| Dim-E2-130  | 130 | -11.38 | -5.670 | 25.07 |
| Dim-E2-133  | 133 | -11.14 | -5.963 | 24.76 |

|             |      |        |        |       |
|-------------|------|--------|--------|-------|
| Dim-E2-136  | 136  | -11.12 | -5.710 | 25.02 |
| Dim-E2-139  | 139  | -10.39 | -5.877 | 24.85 |
| Dim-E2-142  | 142  | -10.83 | -5.881 | 24.85 |
| Dim-E2-145  | 145  | -11.46 | -5.893 | 24.83 |
| Dim-E2-148  | 148  | -11.60 | -5.918 | 24.81 |
| Dim-E2-151  | 151  | -12.11 | -5.912 | 24.82 |
| Dim-E2-154  | 154  | -12.55 | -5.842 | 24.89 |
| Dim-E2-157  | 157  | -12.54 | -6.099 | 24.62 |
| Dim-E2-160  | 160  | -12.08 | -5.760 | 24.97 |
| Dim-E2-163  | 163  | -12.03 | -6.189 | 24.53 |
| Dim-E2-166  | 166  | -11.46 | -5.776 | 24.96 |
| Dim-E2-169  | 169  | -11.24 | -5.553 | 25.19 |
| Dim-E2-175  | 175  | -11.70 | -5.733 | 25.00 |
| Dim-E2-178  | 178  | -11.50 | -5.755 | 24.98 |
| Dim-E2-181  | 181  | -11.39 | -6.024 | 24.70 |
| Dim-E2-184  | 184  | -11.40 | -5.923 | 24.80 |
| Dim-E2-187  | 187  | -10.62 | -5.900 | 24.83 |
| Dim-E2-190  | 190  | -10.89 | -5.827 | 24.90 |
| Dim-E2-193  | 193  | -11.26 | -6.149 | 24.57 |
| Dim-E2-196  | 196  | -10.78 | -5.840 | 24.89 |
| Dim-E2-199  | 199  | -11.44 | -6.053 | 24.67 |
| Dim-E2-202  | 202  | -11.48 | -5.995 | 24.73 |
| Dim-E2-205  | 205  | -10.66 | -5.835 | 24.89 |
| Dim-E2-208  | 208  | -11.06 | -5.989 | 24.74 |
| Dim-E2-211  | 211  | -10.71 | -5.911 | 24.82 |
| Dim-E2-214  | 214  | -10.10 | -5.739 | 24.99 |
| Dim-E2-217  | 217  | -9.943 | -5.846 | 24.88 |
| Dim-E2-220  | 220  | -9.495 | -5.365 | 25.38 |
| Dim-E2-223  | 223  | -8.948 | -4.893 | 25.87 |
| Dim-E2-226  | 226  | -8.687 | -5.040 | 25.71 |
| Dim-E2-229  | 229  | -8.901 | -5.116 | 25.64 |
| Dim-E2-232  | 232  | -9.156 | -5.308 | 25.44 |
| Dim-E2-235  | 235  | -9.776 | -5.613 | 25.12 |
| Dim-E2-238  | 238  | -9.172 | -5.400 | 25.34 |
| Dim-E2-241  | 241  | -8.645 | -5.115 | 25.64 |
| Dim-E2-244  | 244  | -8.223 | -5.358 | 25.39 |
| Dim-E2-247  | 247  | -7.972 | -5.239 | 25.51 |
| Dim-E2-250  | 250  | -8.774 | -5.338 | 25.41 |
| Dim-E2-253  | 253  | -8.814 | -5.555 | 25.18 |
| Dim-E2-256  | 256  | -9.074 | -5.619 | 25.12 |
| Dim-E2-259  | 259  | -8.583 | -5.203 | 25.55 |
| Dim-E2-264  | 264  | -7.652 | -5.189 | 25.56 |
| Dim-E2-270  | 270  | -8.63  | -5.593 | 25.14 |
| Dim-E2-276  | 276  | -7.771 | -5.243 | 25.51 |
| Dim-E2-282  | 282  | -8.951 | -5.783 | 24.95 |
| Dim-E2-288  | 288  | -8.055 | -5.577 | 25.16 |
| Dim-E4-0035 | 3.5  | -8.649 | -5.073 | 25.68 |
| Dim-E4-0115 | 11.5 | -9.06  | -5.406 | 25.34 |
| Dim-E4-0180 | 18   | -8.576 | -5.332 | 25.41 |
| Dim-E4-0245 | 24.5 | -9.305 | -5.569 | 25.17 |
| Dim-E4-0300 | 30   | -9.18  | -4.956 | 25.80 |
| Dim-E4-0370 | 37   | -9.018 | -5.551 | 25.19 |
| Dim-E4-0415 | 41.5 | -8.855 | -5.582 | 25.16 |
| Dim-E4-0485 | 48.5 | -9.053 | -5.580 | 25.16 |
| Dim-E4-0540 | 54   | -8.812 | -5.386 | 25.36 |
| Dim-E4-0615 | 61.5 | -9.445 | -5.671 | 25.06 |
| Dim-E4-0695 | 69.5 | -9.554 | -5.717 | 25.02 |
| Dim-E4-0780 | 78   | -9.188 | -5.505 | 25.24 |
| Dim-E4-0945 | 94.5 | -8.439 | -5.163 | 25.59 |
| Dim-E4-1000 | 100  | -8.905 | -5.437 | 25.31 |
| Dim-E4-1080 | 108  | -9.129 | -5.512 | 25.23 |



|             |           |        |        |       |
|-------------|-----------|--------|--------|-------|
| Dim-E4-1155 | 115.5     | -9.21  | -5.487 | 25.25 |
| Dim-E4-1235 | 123.5     | -9.242 | -5.426 | 25.32 |
| Dim-E4-1310 | 131       | -9.414 | -5.433 | 25.31 |
| Dim-E4-1370 | 137       | -8.88  | -5.399 | 25.34 |
| Dim-E4-1455 | 145.5     | -8.08  | -5.271 | 25.48 |
| Dim-E4-1535 | 153.5     | -7.586 | -5.112 | 25.64 |
| Dim-E4-1600 | 160       | -7.019 | -5.186 | 25.56 |
| Dim-E4-1655 | 165.5     | -7.665 | -5.193 | 25.56 |
| Dim-E4-1760 | 176       | -7.315 | -5.020 | 25.74 |
| Dim-E4-1830 | 183       | -7.607 | -5.069 | 25.68 |
| Dim-E4-1920 | 192       | -7.486 | -5.001 | 25.75 |
| Dim-E4-1985 | 198.5     | -7.88  | -5.369 | 25.38 |
| Dim-E4-2030 | 203       | -8.413 | -5.356 | 25.39 |
| Dim-E4-2110 | 211       | -8.262 | -5.287 | 25.46 |
| Dim-E4-2195 | 219.5     | -8.321 | -5.373 | 25.37 |
| Dim-E4-2275 | 227.5     | -8.245 | -5.505 | 25.24 |
| Dim-E4-2360 | 236       | -8.953 | -5.638 | 25.10 |
| Dim-E4-2430 | 243       | -7.862 | -5.575 | 25.16 |
| Dim-E4-2510 | 251       | -9.094 | -5.763 | 24.97 |
| Dim-E4-2605 | 260.5     | -8.954 | -5.725 | 25.01 |
| Dim-E4-2665 | 266.5     | -8.578 | -5.525 | 25.22 |
| Dim-E4-2740 | 274       | -7.664 | -5.279 | 25.47 |
| Dim-E4-2905 | 290.5     | -6.89  | -5.344 | 25.40 |
| Dim-E4-2955 | 295.5     | -7.964 | -5.567 | 25.17 |
| Dim-E4-3035 | 303.5     | -8.398 | -6.110 | 24.61 |
| Dim-E4-3125 | 312.5     | -7.572 | -5.677 | 25.06 |
| Dim-E4-3200 | 320       | -7.449 | -5.728 | 25.01 |
| Dim-E4-3255 | 325.5     | -7.771 | -5.761 | 24.97 |
| Dim-E4-3335 | 333.5     | -8.079 | -5.659 | 25.08 |
| Dim-E4-3425 | 342.5     | -8.353 | -5.881 | 24.85 |
| Dim-E4-3475 | 347.5     | -8.66  | -5.791 | 24.94 |
| Dim-E4-3525 | 352.5     | -7.877 | -5.706 | 25.03 |
| Dim-E4-3580 | 358       | -8.135 | -5.660 | 25.08 |
| Dim-E4-3670 | 367       | -8.558 | -5.883 | 24.85 |
| Dim-E4-3770 | 377       | -7.913 | -5.905 | 24.82 |
| Dim-HR*     | Host rock | 5.439  | -0.714 | 30.17 |

\*Dim-HR denotes for the dolomitic limestone host-rock for the Dim Cave.

**Table S4** Hendy test  $\delta^{18}\text{O}$  and  $\delta^{13}\text{C}$  isotope values of the speleothems from the Dim Cave (Alanya, SW Turkey) (values are in per mil: ‰)

| Growth period                   | Sample ID      | Depth (mm) | Distance to axes (mm) | $\delta^{13}\text{C}$ (VPDB) | $\delta^{18}\text{O}$ (VPDB) | $\delta^{18}\text{O}$ VSMOW |
|---------------------------------|----------------|------------|-----------------------|------------------------------|------------------------------|-----------------------------|
| 1st growth phase<br>(~80–90 ka) | H-Dim-E3-261-1 | 261.0      | 4.0                   | -7.062                       | -5.376                       | 25.37                       |
|                                 | H-Dim-E3-261-2 | 261.0      | 18.0                  | -7.745                       | -6.443                       | 24.27                       |
|                                 | H-Dim-E3-261-3 | 261.0      | 23.0                  | -6.834                       | -5.356                       | 25.39                       |
|                                 | H-Dim-E3-261-4 | 261.0      | 29.0                  | -6.442                       | -5.039                       | 25.72                       |
|                                 | H-Dim-E3-261-5 | 261.0      | 34.0                  | -8.078                       | -5.259                       | 25.49                       |
| 2nd growth phase<br>(~62–72 ka) | H-Dim-E3-194-1 | 194.0      | 9.0                   | -9.115                       | -4.589                       | 26.18                       |
|                                 | H-Dim-E3-194-2 | 194.0      | 17.0                  | -8.914                       | -4.591                       | 26.18                       |
|                                 | H-Dim-E3-194-3 | 194.0      | 23.0                  | -9.138                       | -5.102                       | 25.65                       |
|                                 | H-Dim-E3-194-4 | 194.0      | 30.0                  | -8.875                       | -4.543                       | 26.23                       |
|                                 | H-Dim-E3-194-5 | 194.0      | 36.0                  | -8.614                       | -4.392                       | 26.38                       |
| 3rd growth phase<br>(~40–52 ka) | H-Dim-E3-085-1 | 8.5        | 4.0                   | -7.084                       | -4.663                       | 26.10                       |
|                                 | H-Dim-E3-085-2 | 8.5        | 11.0                  | -7.174                       | -4.614                       | 26.15                       |
|                                 | H-Dim-E3-085-3 | 8.5        | 18.0                  | -6.434                       | -4.515                       | 26.25                       |
|                                 | H-Dim-E3-085-4 | 8.5        | 27.0                  | -7.468                       | -4.607                       | 26.16                       |
|                                 | H-Dim-E3-085-5 | 8.5        | 34.0                  | -7.266                       | -4.561                       | 26.21                       |
| 4th growth phase<br>(~13–40 ka) | H-Dim-E3-040-1 | 4.0        | 6.0                   | -5.721                       | -4.719                       | 26.05                       |
|                                 | H-Dim-E3-040-2 | 4.0        | 14.0                  | -5.257                       | -4.842                       | 25.92                       |
|                                 | H-Dim-E3-040-3 | 4.0        | 21.0                  | -5.186                       | -4.818                       | 25.94                       |
|                                 | H-Dim-E3-040-4 | 4.0        | 28.0                  | -5.081                       | -4.695                       | 26.07                       |
|                                 | H-Dim-E3-040-5 | 4.0        | 34.0                  | -5.079                       | -4.471                       | 26.30                       |
| Growth period<br>(10.6–11.9ka)  | H-Dim-E2-130-1 | 130.0      | 5.0                   | -11.096                      | -5.633                       | 25.10                       |
|                                 | H-Dim-E2-130-2 | 130.0      | 13.0                  | -11.299                      | -5.589                       | 25.15                       |
|                                 | H-Dim-E2-130-3 | 130.0      | 20.0                  | -11.036                      | -5.704                       | 25.03                       |
|                                 | H-Dim-E2-130-4 | 130.0      | 27.0                  | -10.704                      | -5.449                       | 25.29                       |
|                                 | H-Dim-E2-130-5 | 130.0      | 34.0                  | -10.498                      | -5.310                       | 25.44                       |
| Growth period<br>(12.8–12.9 ka) | H-Dim-E4-178-1 | 178.0      | 5.5                   | -7.393                       | -5.637                       | 25.10                       |
|                                 | H-Dim-E4-178-2 | 178.0      | 11.0                  | -7.346                       | -4.995                       | 25.76                       |
|                                 | H-Dim-E4-178-3 | 178.0      | 16.0                  | -7.367                       | -4.996                       | 25.76                       |
|                                 | H-Dim-E4-178-4 | 178.0      | 23.0                  | -7.531                       | -4.967                       | 25.79                       |
|                                 | H-Dim-E4-178-5 | 178.0      | 29.0                  | -7.651                       | -5.125                       | 25.63                       |

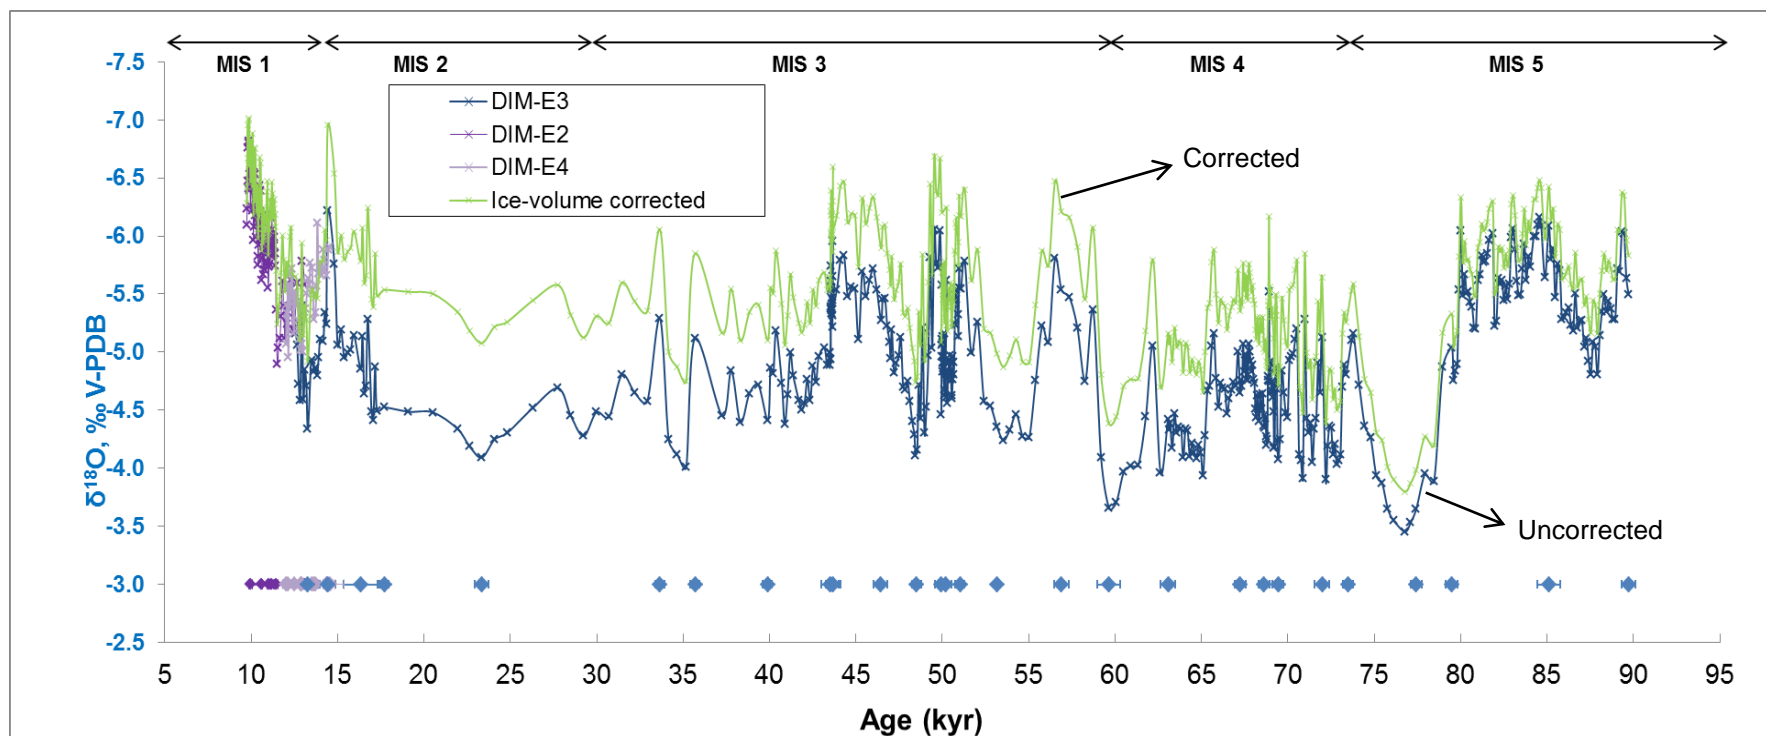

**Figure S6** Ice volume-corrected stalagmite  $\delta^{18}\text{O}$  record of the Dim Cave. Light green curve shows the composite stalagmite  $\delta^{18}\text{O}$  record after correction for ice volume-related  $\delta^{18}\text{O}$  contributions to seawater<sup>4</sup>. Blue, purple and light purple curves represent uncorrected  $\delta^{18}\text{O}$  records of stalagmites Dim-E3, Dim-E2, and Dim-E4, respectively. Corresponding-coloured diamonds show U-series ages of the stalagmites. Age models are constructed by linear interpolation.

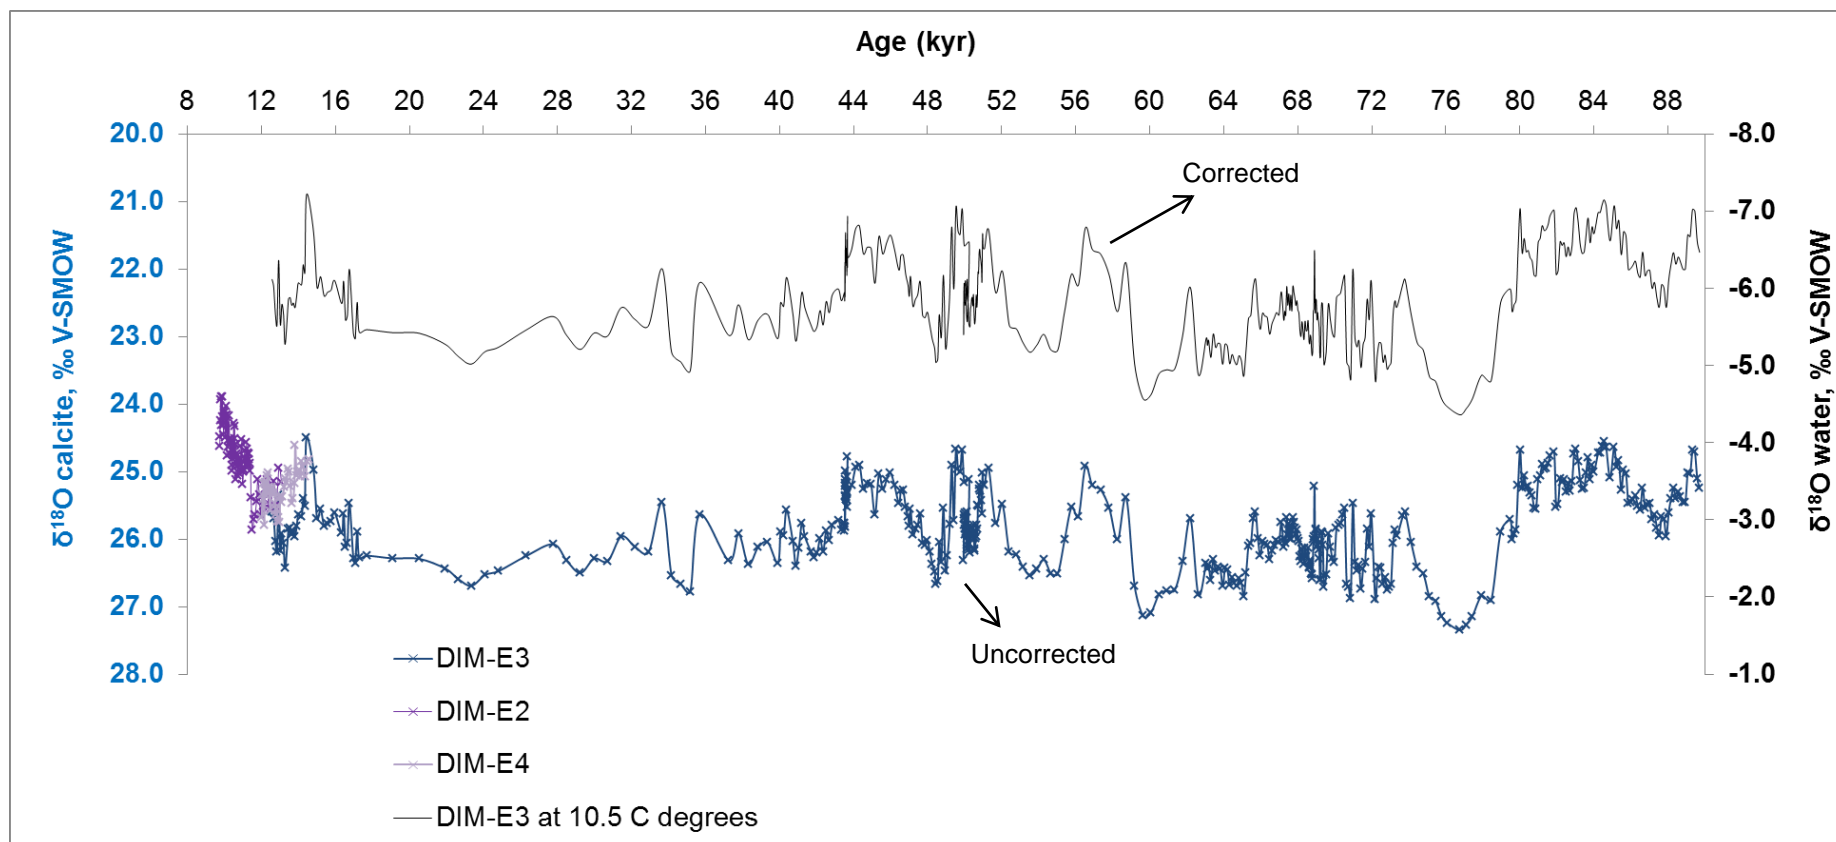

**Figure S7** Calcite-water fractionation-corrected stalagmite  $\delta^{18}\text{O}$  record of the Dim Cave. Light black curve shows composite  $\delta^{18}\text{O}_{\text{water}}$  record after applying calcite-water fractionation equation<sup>5</sup> on  $\delta^{18}\text{O}_{\text{calcite}}$ , assuming 10.5 °C (8 degrees lower than today<sup>1,6,7</sup>) within the cave during glacial times. Blue, purple and light purple curves represent uncorrected  $\delta^{18}\text{O}$  records of Dim-E3, Dim-E2, and Dim-E4, respectively. Note that correction is applied only to Dim-E3, which formed between ~90 and 13 kyr during the last glaciation.

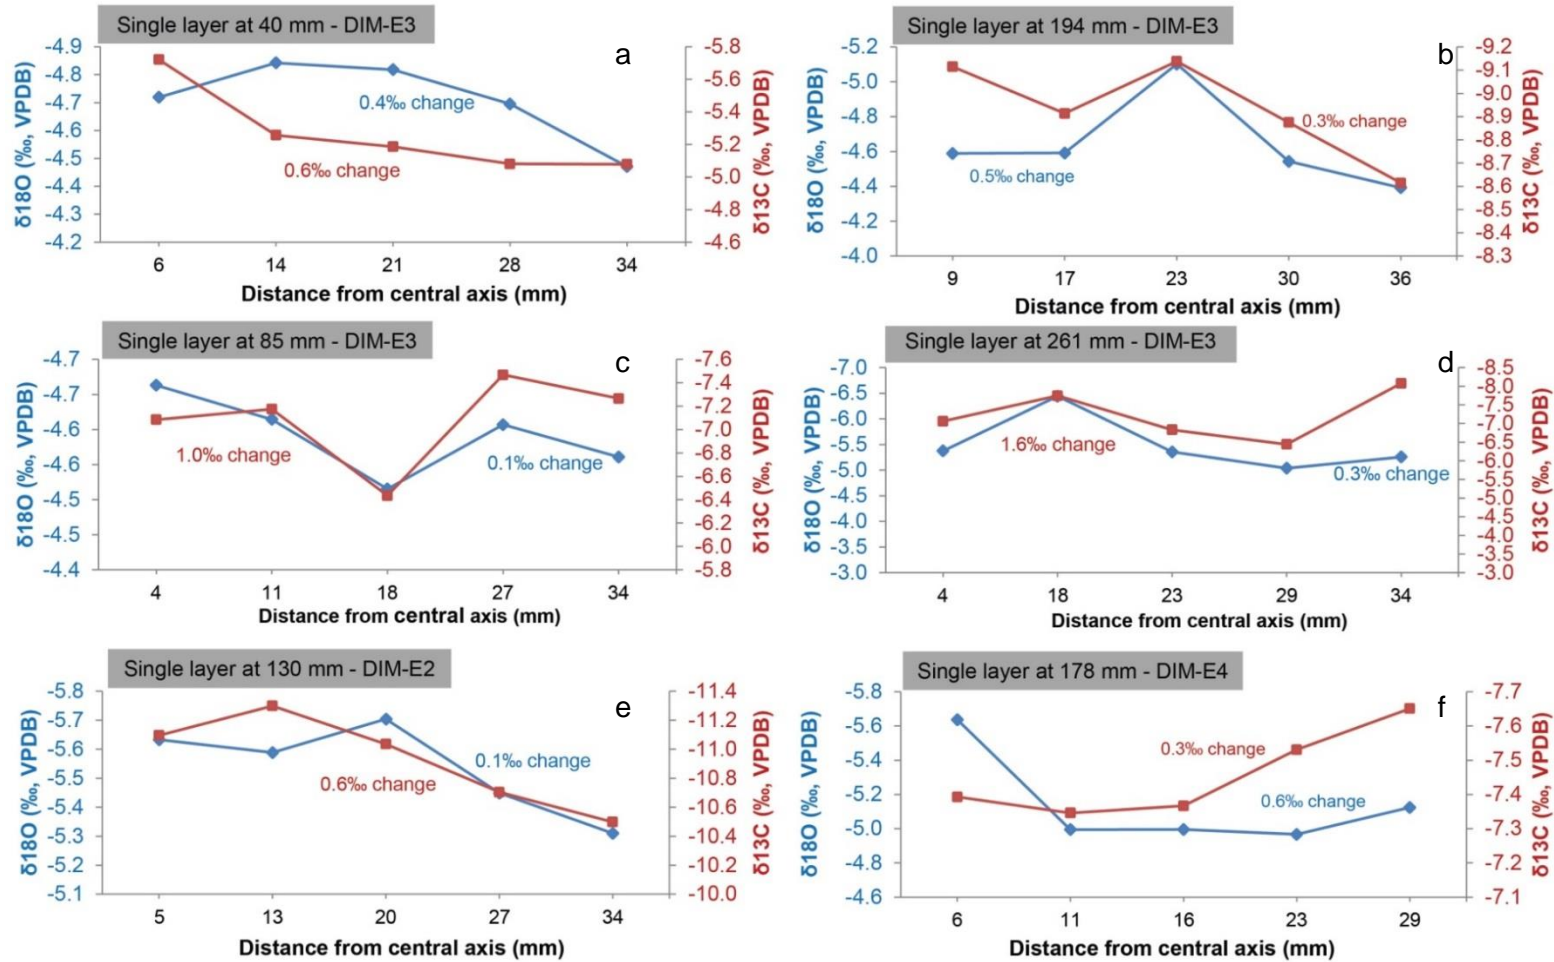

**Figure S8**  $\delta^{18}\text{O}$  and  $\delta^{13}\text{C}$  plots for Hendy tests<sup>8</sup> along individual layers of Dim-E3 (a, b, c, and d), Dim-E2 (e) and Dim-E4 (f). Isotopic values are plotted as distances away from the central growth axis. Note that the  $\delta^{18}\text{O}$  values do not vary by more than 0.5‰ along the majority of tested growth layers (except for Dim-E4; f) and do not correlate with  $\delta^{13}\text{C}$  values ( $R^2 = 0.2$ ), suggesting that the stalagmites were deposited at or close to quasi-isotopic equilibrium.

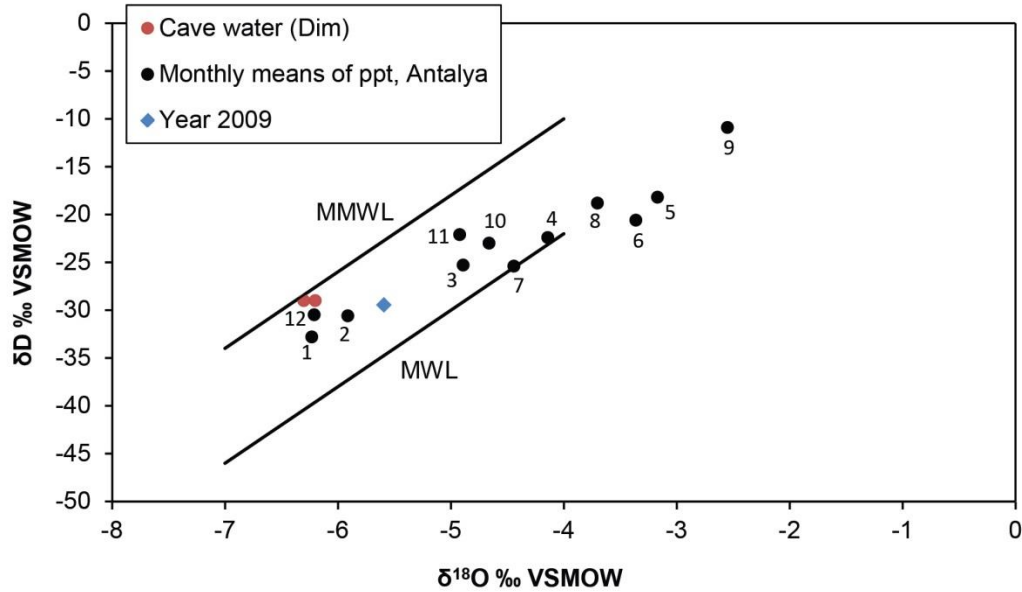

**Figure S9**  $\delta^{18}\text{O}$  and  $\delta\text{D}$  relationships of rainfall for the GNIP Antalya station for the period 1963–2009<sup>3</sup>; numbers indicate the respective month in Northern Hemisphere. Modern cave water values are very close to winter rainfall and most recent 2009 rainfall values. The Mediterranean Meteoric Water Line (MMWL)<sup>9</sup> and Meteoric Water Line (MWL)<sup>10</sup> are shown as references. Note that the winter rainfall data plot close to MMWL, while summer/spring rainfall show global MML signals.

### Alternative Hypotheses for the interpretation of Dim isotope record

#### 1. Temperature-based interpretation

The temperature dependence of speleothem  $\delta^{18}\text{O}$  is variable and closely linked to the site conditions<sup>11</sup>. In principle the regional mean annual temperature over the cave is assumed to control the  $\delta^{18}\text{O}$  of calcite deposited from drip waters. Thus,  $\delta^{18}\text{O}$  of calcite will reflect more depleted values during glacial periods and vice versa for the interglacials (e.g. Holocene), which is opposite to what is observed in the Dim Cave. The Dim record shows isotopically lighter values (from -4.5 to -7‰ VPDB; Fig. 2c) in the Holocene than in the glacial periods<sup>6,12</sup>. Temperature dependence of isotopic signatures of speleothems are well-exemplified from the Sofular record from Black Sea region<sup>13</sup> where  $\delta^{18}\text{O}$  values of calcite becomes less negative towards Holocene (~-13 to -8‰ VPDB; Fig. 2a). In contrast, the Dim record cannot reflect temperature changes. This situation is quite common in the literature for relatively close sites. For example some records from New Zealand follow temperature<sup>14</sup> while others sites have a reverse isotopic signal from the  $\delta^{18}\text{O}$ <sup>15</sup>.



## *2. Volume of rainfall (amount effect)*

The amount effect is widely interpreted as a control on the isotopic composition of speleothems. In the case of the last glaciation from DIM, this interpretation is difficult to sustain. We have independent evidence from two sources that show that conditions during glacial periods are drier or at least no wetter than in the Holocene. The PMIP reconstruction for the LGM<sup>16</sup> suggests rainfall values that are virtually identical to modern. More tellingly, our speleothem growth rates from Dim-E3 (Fig. S2a) reveal that growth rates are positive during glacial times but are much slower than the early Holocene (which is known to be wet in the EM<sup>17,18</sup>). The fact that the moisture balance is positive in glacial times does not imply higher rainfall. In fact, reduced evaporative flux due to depressed temperatures, reduced forest cover and increased snow-cover all divert the limited moisture flow to groundwater pathways. It is highly likely that all of the glacial period has less rainfall than the Holocene.

## *3. Seasonality of Rainfall*

SW Turkey is located in the heart of the westerly flow zone. At the present day almost no precipitation occurs in summer and if the shoulder months are taken into account winter rainfall dominates completely<sup>3</sup>. This is evident from all the modern climatological data<sup>19-21</sup>. For the last glacial cycle, the coldest period is the LGM and the PMIP models clearly demonstrate that there is no switch from winter to summer dominated rainfall in this part of the EM<sup>16</sup>. It is virtually impossible for monsoonal rain to penetrate this far north under modern conditions and the likelihood under glacial conditions is significantly reduced.

## *4. Evaporation effects*

Evaporation effects on the speleothem isotopic signal are important. This is actually embedded in our interpretation because the air mass changes involve a complex mix of changed temperature and evaporation due to source area, cloud cover and other variables.

## *5. Sea air temperature*

The changes in ocean source moisture will relate to a series of independent variables. These include; 1) regional changes in air temperature, which is also caused by the air masses passing over the region; 2) changes in the thermohaline circulation in the eastern Mediterranean<sup>22</sup>. In theory this is hard to incorporate, but the thermohaline circulation reflects primarily wind stress across the basin and the through flow to/from the Atlantic. Both of these are directly related to the westerly circulation and what is happening in the North Atlantic source area, and so are closely linked with the westerly air masses. We also note that the smaller scale changes in

deep/intermediate water formation relate to decadal scale changes in the Mediterranean Basin<sup>23</sup> and these are likely to be integrated out of a millennial scale record.

### Supplementary References

1. Gündalı, N., Nazik, L., Soylu, C. ., Aksoy, B. & Beydeş, S. *Dim Mağarası (Alanya) Araştırma Raporu, Mimari ve Elektrikasyon Uygulama Projeleri (in Turkish, unpublished report no. 369)* (1989).
2. Frisia, S. Ā. Microstratigraphic logging of calcite fabrics in speleothems as tool for palaeoclimate studies. *Int. J. Speleol.* **44**, 1–16 (2015).
3. IAEA/WMO. Global Network of Isotopes in Precipitation. The GNIP Database. (2015). Accessible at < <http://www.iaea.org/water>>
4. Bintanja, R. & van de Wal, R. S. W. North American ice-sheet dynamics and the onset of 100,000-year glacial cycles. *Nature* **454**, 869–72 (2008).
5. Kim, S.-T. & O’Neil, J. R. Equilibrium and nonequilibrium oxygen isotope effects in synthetic carbonates. *Geochim. Cosmochim. Acta* **61**, 3461–3475 (1997).
6. Hughes, P. D., Gibbard, P. L. & Ehlers, J. Timing of glaciation during the last glacial cycle: evaluating the concept of a global “Last Glacial Maximum” (LGM). *Earth-Science Rev.* **125**, 171–198 (2013).
7. Sarıkaya, M. A., Çiner, A., Haybat, H. & Zreda, M. An early advance of glaciers on Mount Akdağ, SW Turkey, before the global Last Glacial Maximum; insights from cosmogenic nuclides and glacier modeling. *Quat. Sci. Rev.* **88**, 96–109 (2014).
8. Hendy, C. H. The isotopic geochemistry of speleothems-I. The calculation of the effects of different modes of formation on the isotopic composition of speleothems and their applicability as paleoclimatic indicators. *Geochim. Cosmochim. Acta* **35**, 801–824 (1971).
9. Gat, J. R. & Carmi, I. Effect of climate changes on the precipitation patterns and isotopic composition of water in a climate transition zone: Case of the Eastern Mediterranean Sea area. in *Influ. Clim. Chnage Clim. Var. Hydrolic Regime Water Resour.* **1968**, 513–524 (IAHS Publ. no. 168, 1987).
10. Craig, H. Isotopic Variations in Meteoric Waters. *Science* **133**, 1702–1703 (1961).
11. McDermott, F. Palaeo-climate reconstruction from stable isotope variations in speleothems: a review. *Quat. Sci. Rev.* **23**, 901–918 (2004).
12. Essallami, L., Sicre, M. a., Kallel, N., Labeyrie, L. & Siani, G. Hydrological changes in the Mediterranean Sea over the last 30,000 years. *Geochemistry, Geophys. Geosystems* **8**, 1–11 (2007).
13. Fleitmann, D. *et al.* Timing and climatic impact of Greenland interstadials recorded in stalagmites from northern Turkey. *Geophys. Res. Lett.* **36**, 1–5 (2009).

14. Williams, P. W., King, D. N. T., Zhao, J.-X. & Collerson, K. D. Late Pleistocene to Holocene composite speleothem  $^{18}\text{O}$  and  $^{13}\text{C}$  chronologies from South Island, New Zealand—did a global Younger Dryas really exist? *Earth Planet. Sci. Lett.* **230**, 301–317 (2005).
15. Hellstrom, J., Mcculloch, M. & Stone, J. A Detailed 31,000-Year Record of Climate and Vegetation Change, from the Isotope Geochemistry of Two New Zealand Speleothems. *Quat. Res.* **178**, 167–178 (1998).
16. Braconnot, P. *et al.* Results of PMIP2 coupled simulations of the Mid-Holocene and Last Glacial Maximum – Part 1: experiments and large-scale features. *Clim. Past* **3**, 261–277 (2007).
17. Jones, M. D., Roberts, C. N. & Leng, M. J. Quantifying climatic change through the last glacial–interglacial transition based on lake isotope palaeohydrology from central Turkey. *Quat. Res.* **67**, 463–473 (2007).
18. Lisker, S., Vaks, A., Bar-Matthews, M., Porat, R. & Frumkin, A. Late Pleistocene palaeoclimatic and palaeoenvironmental reconstruction of the Dead Sea area (Israel), based on speleothems and cave stromatolites. *Quat. Sci. Rev.* **29**, 1201–1211 (2010).
19. Jex, C. N. *et al.* A 500yr speleothem-derived reconstruction of late autumn–winter precipitation, northeast Turkey. *Quat. Res.* **75**, 399–405 (2011).
20. Sarıkaya, M. A., Zreda, M., Çiner, A. & Zweck, C. Cold and wet Last Glacial Maximum on Mount Sandıras, SW Turkey, inferred from cosmogenic dating and glacier modeling. *Quat. Sci. Rev.* **27**, 769–780 (2008).
21. Türkeş, M. & Erlat, E. Winter mean temperature variability in Turkey associated with the North Atlantic Oscillation. *Meteorol. Atmos. Phys.* **105**, 211–225 (2009).
22. Bar-Matthews, M., Ayalon, A., Kaufman, A. & Wasserburg, G. J. The Eastern Mediterranean paleoclimate as a reflection of regional events: Soreq cave, Israel. *Earth Planet. Sci. Lett.* **166**, 85–95 (1999).
23. Pinardi, N. & Masetti, E. Variability of the large scale general circulation of the Mediterranean Sea from observations and modelling: a review. *Palaeogeogr. Palaeoclimatol. Palaeoecol.* **158**, 153–173 (2000).
